A type 2 diabetes disease module with a high collective influence for Cdk2 and PTPLAD1 is localized in endosomes

*Martial Boutchueng-Djidjou<sup>1#</sup>, Pascal Belleau<sup>2</sup>, Nicolas Bilodeau<sup>1</sup>, Suzanne Fortier<sup>1</sup>, Sylvie Bourassa<sup>2</sup>, Arnaud Droit<sup>2</sup>, Sabine Elowe<sup>1</sup>, Robert L. Faure<sup>1\*</sup>*

<sup>1</sup>Département of Pediatrics, Faculty of Medicine, Université Laval, Centre de Recherche du CHU de Québec, Québec city, G1V4G2, Canada.

<sup>2</sup>Plateforme Protéomique de l'Est du Québec, Université Laval. Université Laval, Québec, QC, Canada.

<sup>#</sup> Present address: H. Lee Moffit Cancer Center and Research Institute, Tampa, FL, USA.

\*Corresponding author

[robert.faure@crchudequebec.ulaval.ca](mailto:robert.faure@crchudequebec.ulaval.ca) (RF)

## Acknowledgements

The research program in the R. Faure laboratory was funded by the National Sciences and Engineering Research Council of Canada (NSERC: 155751) and the Fondation du CHU de Québec. M. B-D acknowledges funding from the Fondation du CHU de Québec and the CRCHUQ. S.E. holds a FRQS junior investigator salary award.

## 1 **Abstract**

2 **Despite the identification of many susceptibility genes our knowledge of the underlying mechanisms**  
3 **responsible for complex disease remains limited. Here, we identified a type 2 diabetes disease**  
4 **module in endosomes, and validate it for functional relevance on selected nodes. Using hepatic**  
5 **Golgi/endosomes fractions, we established a proteome of insulin receptor-containing endosomes**  
6 **that allowed the study of physical protein interaction networks on a type 2 diabetes background.**  
7 **The resulting collated network is formed by 313 nodes and 1147 edges with a topology organized**  
8 **around a few major hubs with Cdk2 displaying the highest collective influence. Overall, 88% of the**  
9 **nodes are associated with the type 2 diabetes genetic risk, including 101 new candidates. The Type**  
10 **2 diabetes module is enriched with cytoskeleton and luminal acidification –dependent processes that**  
11 **are shared with secretion-related mechanisms. We identified new signaling pathways driven by**  
12 **Cdk2 and PTPLAD1 whose expression regulate the association of the insulin receptor with TUBA,**  
13 **TUBB, the actin component ACTB and the endosomal sorting markers Rab5c and Rab11a.**  
14 **Therefore, the interactome of internalized insulin receptors reveals the presence of a type 2 diabetes**  
15 **disease module enriched in new layers of feedback loops required for insulin signaling, clearance**  
16 **and islet biology.**

## 17 18 19 20 21 **Author Summary**

22 According to the local hypothesis each complex disease can be linked to a well-defined network called the  
23 disease module. A disease module can be defined by the topological properties of protein interaction  
24 networks. Given the complexity of the whole interaction map the existence of such disease modules remains  
25 largely to be tested. Here, we found a type 2 diabetes disease module in insulin receptor-containing  
26 endosomes. The disease module contains new pathways that are associated with both insulin signaling,  
27 clearance and secretion. Its co-functionality with islets biology may provide a mechanistic rationale for the  
28 exploration of personalized medicine and elaborate new drugs.

29

## 30 **Introduction**

31 The insulin receptor (IR) belongs to the receptor tyrosine-kinase (RTK) family of cell-  
32 surface receptors [1, 2]. Early work on insulin and epidermal growth factor (EGF) revealed  
33 the presence of signaling molecules in hepatic endosomes fractions [3]. The concept of  
34 endosomal signaling is now well established [4-6], but the rules underlying IR trafficking  
35 and signaling compared with those underlying the EGF receptor (EGFR) remain relatively  
36 unknown; this may be because proper insulin signaling and trafficking correlate with the  
37 maintenance of cell polarity [7].

38 Type 2 diabetes (T2D) is the result of a chronic energy surplus [8] coupled with a strong  
39 hereditary component. Estimates for the heritability of T2D range from 20 to 80% with a  
40 sibling relative risk of approximately 2, with obesity being an important driver in every  
41 population. The detailed genetic architecture of T2D was recently elucidated, and unlike  
42 type 1 diabetes (T1D) where the genetic risk is mostly concentrated in the HLA region, the  
43 genetic component explaining part of the heritability of T2D is primarily due to a  
44 combination of numerous common variants of small effect scattered across the genome [9-  
45 11]. T2D is characterized by both resistance to the action of insulin and defects in insulin  
46 secretion; the former has been an important motivating factor in the exploration of insulin  
47 signaling [1, 2]. Previous efforts to demonstrate that the genes mapping close to T2D risk  
48 loci are enriched for established insulin signaling pathways, however met with limited  
49 success; the most robust finding to date implicates seemingly unrelated cellular mechanisms,  
50 the majority of which affect insulin secretion and beta cell function [10-14].

51 An accumulation of proteins associated with T2D was previously observed in the  
52 interactome of the IRs endocytosed in an hepatic Golgi/endosomes fraction [15], suggesting  
53 the existence of a disease module at this intracellular locus that could help to further  
54 understand IR routing mechanisms, the primary mechanisms of the disease and drive the  
55 development of rational approaches for new therapies [16, 17]. Here, starting from a  
56 proteome of IR-containing endosomes to narrow the space search and the construction of a  
57 T2D-protomodule using validated genes, we reveal the presence of a T2D disease module  
58 with functional relevance both to insulin targets and insulin producing cells.

59

## 60 **Results**

### 61 **Recycling Rabs, V-ATPase subunits, tyrosine phosphatases, and cell cycle proteins** 62 **shape IR-containing endosomes.**

63 To determine the proteomic environment of the internalized IRs, we performed a survey of  
64 IR-containing endosomes fractions. We started with a mixed Golgi/endosomes fraction  
65 (G/E) using a single dose of insulin (1.5  $\mu\text{g}/100$  g body weight [b.w.]) that resulted in 50%  
66 saturation of rat liver receptors. Fractions were prepared at the 2-minute time peak of IR  
67 accumulation and the 15-minute 50% decline time [15, 18] to collect a larger proteome.  
68 Freshly prepared fractions were then incubated with anti-IR ( $\beta$ -subunit)-coated magnetic  
69 beads, and endosomes were collected with a magnet [19, 20]. We identified a total of 620  
70 proteins with high confidence (named IREP: IR Endosome Proteome, Fig 1A and  
71 S1Table). Gene ontology (GO) analysis revealed enrichment of proteins involved in  
72 trafficking and signaling (MGI database; Biological Network Gene Ontology (BINGO)  
73 tool). These were primarily represented by coat-forming elements, small GTPases,  
74 components of the actin cytoskeleton, microtubules and motor proteins of the microtubule  
75 cytoskeleton and regulators of the cell cycle (Fig 1A, B left panel). Immunoblotting

76 analysis confirmed the peak of IR accumulation occurring at 2 minutes post-insulin  
77 injection (Fig 1B right panel). The protein PTPLAD1 (*HACD3*), previously observed to be  
78 associated with the IR in G/E fractions after insulin stimulation [15], was also detected here  
79 at 15 minutes post-insulin injection (Figure 1B, right panel). Consistent with the presence  
80 of sets of Rabs [19, 21] and the highly recyclable fate of IRs in the liver compared with the  
81 low-recycling receptor EGFR in liver [3], thirteen Rabs were identified, all involved in  
82 transport from early to recycling endosomes (Rab22a, 2 minutes post-insulin injection) or  
83 late recycling endosomes (Rab11a, Rab17) [22]. Rab8a, reported to act exclusively in the  
84 trans-Golgi network to plasma membrane transport, was identified at 15 minutes post-  
85 insulin injection (Fig 1A). Other Rabs identified at both times (Rab6a, Rab5c, Rab1a,  
86 Rab2b, Rab11b, Rab14, Rab1b, Rab7a and Rap1b) are all implicated in recycling,  
87 transcytotic or Golgi transport events [19, 22]. Among signaling proteins, the  
88 transmembrane protein tyrosine phosphatase (PTP) of the R subfamily [23], PTPRF (also  
89 named leukocytes antigen-related, LAR) was identified (Fig 1A). PTPRs are generally  
90 associated with IR tyrosine dephosphorylation [24-27], acting preferentially on the  
91 juxtamembrane sites Y960 and Y1146 located in the IR activation loop [25, 27]. The  
92 putative PTP Dnajc6 (also called auxillin) is a chaperone involved in clathrin-mediated  
93 endocytosis of EGFR [28, 29]. PTPN6 (SHP-1) is a known IR regulator in the liver [30].  
94 The large representation of regulators of the cell cycle was less expected but is consistent  
95 with the attenuation of endocytosis during cell division [31]. The proton translocation  
96 machinery necessary to achieve optimal lumenal acidic pH is also particularly well  
97 represented by the identification of V-ATPase subunits (ATPv1a, ATPv1b2, ATPv1f,  
98 ATPv1e1, ATPv0a1; 2 minutes post-insulin injection) (Fig 1A and B left panel, S1Table).  
99 Efficient acidification by V-ATPase is particularly important for the ligand dissociation-  
100 degradation sequence according to the law of mass action and is specific to insulin in  
101 contrast with EGF or prolactin complexes. This sequence is followed by a rapid recycling  
102 of the freed IR under the concerted action of endosomal protein tyrosine phosphatases  
103 (PTPs), thus supporting efficient circulating clearance [3, 32].

104

### 105 **Genes at risk for type-2 diabetes form a proto-module enriched for transport and** 106 **oxygen species regulation.**

107 Most of the established T2D genes are supported by low and high probability GWAS  
108 signals of their identified variants [10, 11]. To verify if the IREP is associated with T2D,  
109 we used complementary data sources (DIAGRAM consortium, SNPs provided in  
110 replicated GWAS from the NHGRI-EBI GWAS catalog and GWAS Central portal, source  
111 S2Table) to compile a list of 452 T2D and associated trait genes on the basis of single-  
112 nucleotide polymorphisms (SNPs) identified in their genomic loci (diabetes-associated  
113 gene: DAG; p-value <  $5 \times 10^{-8}$ ; S3Table). This list also contains relevant genes associated  
114 with T2D Mendelian traits described in the OMIM database and tagged with the symbol  
115 (3) indicative of known molecular associations (S3Table, sheet OMIM). To reduce false-  
116 positive associations, the 452 DAG products were validated in a physical protein  
117 interaction network (PPIN) [16, 33]. We gathered physical protein-protein interaction data  
118 from the Biological General Repository Interaction Datasets (BIOGRID), the human  
119 interactomes I and II generated with Y2H systems from the Center for System Biology  
120 (CCSB) interactome, Intact, Reactome, Database of Interacting Proteins (DIP, UCLA),  
121 HitPredict databases or from the Human Proteins Repository Database (HPRD). The

122 network was visualized with Cytoscape [34]. The 452 DAG products formed a PPIN of  
123 184 proteins and 309 interactions we called the *proto-T2D module* (Fig 2A and S4Table,  
124 sheet T2DN-protomodule). The proto-T2D module is made up essentially of protein  
125 coding-genes from OMIM (26%), GWAS variants with a p-value  $< 1 \times 10^{-8}$ ; 69%, and  
126 GWAS variants with  $5 \times 10^{-8} < \text{p-value} < 1 \times 10^{-8}$ ; 5%, (Fig 2B). It displays a scale-free  
127 topology relying on a few hubs of large size such as HNF4A surrounded by a majority of  
128 the peripheral nodes (more than 38% of the nodes have only one interactor) [16, 17] (Fig  
129 2A and C; S5Table, sheet-ProtoT2Dmodule). Protein transport ( $p < 1.82 \times 10^{-34}$ ) and  
130 response to oxygen-containing compounds ( $p < 1.32 \times 10^{-32}$ ) are the most enriched cellular  
131 processes identified by a gene ontology (GO) analysis with the presence of trafficking  
132 proteins (Rab5b, RABEPP1, RABEPP2) and transcription factors from the HNF (HNF4A,  
133 HNF1A or HNF1B), FOX (FOXO3, FOXA2) and TCF families (TCF7L2, TCF4, and  
134 TCF19). Signaling modules associated with insulin sensitivity are also present (INSR,  
135 IRSs, GRB14, PTPN1) (Fig 2A; S5Table, sheet GO analysis-T2D-protomodule). The  
136 affinity for these biological processes is supported by the enriched subcellular component  
137 analysis which revealed an accumulation of the coding genes associated with risk for T2D  
138 in endosomes and endoplasmic reticulum among the major genes. Proteins from the  
139 histocompatibility complex are also among the most significant clusters in the T2D-  
140 protomodule (Fig 2A; S5Table, sheet GO analysis-T2D-protomodule).

141 Overall, 62% of the 452 selected DAGs are disconnected (267/452). Five factors likely  
142 contribute to this fragmentation as follows:

- 143 i) True lack of binary or indirect physical interaction.
- 144 ii) Interactome incompleteness [33].
- 145 iii) False positives (not all genes have a known mechanistic association with the  
146 disease) and genes associated with late complications of the disease.
- 147 iv) The T1D-T2D paradox and disease classification [9].
- 148 v) Missing heritability [10, 11].

149

### 150 **A total of 101 high confidence candidate genes for type 2 diabetes risk are identified** 151 **in IREP.**

152 Genes that fall within one of the known disease loci and whose protein products interact  
153 with a known risk factor are predicted to be 10-fold enriched in a true disease gene. By  
154 considering the cellular localization as well, the network information leads to a 1000-fold  
155 enrichment over random genes [16, 35]. We used a combination of approaches to identify  
156 candidate genes confidently associated with diabetes traits. The candidates were grouped  
157 and ranked according to i) their topological proximity with the 184 previously validated  
158 DAG “seeds” in the PPIN approach, ii) the probability of colocalization in the same  
159 subcellular locus (S6Table), iii) the identification of proximal variants correlating with the  
160 diabetes GWAS signal by fine-mapping analysis (S7Table) and iv) the similarity of gene  
161 expression regulation with the 184 seeds of the proto-T2D-module (S8Table), see Methods.  
162 A total of 246 nonredundant IREP coding genes are associated with diabetes traits when  
163 considering each of the approaches individually. Of these, 38 were validated by at least three  
164 of the approaches mentioned previously. This list includes the *Cdk2* gene which is located  
165 in the risk area composed of 4 blocks in strong LD around the T2D SNP rs2069408 (Fig  
166 S1A; S7Table). ATIC, which was previously observed to be associated with the IR in  
167 endosomes together with PTPLAD1 and AMPK [15]; PTPN6 (SHP-1); the small GTPases

168 of Rab the family (Rab14, and Rab5c); and a series of coat components (i.e., AP complexes,  
169 CAV1, COPA, SEC23A and SEC24C) are also present (Table 1). Sixty-three other IREP  
170 coding genes are shown to have reliable association with diabetes after validation with any  
171 two approaches. This list includes the *HACD3* (PTPLAD1) gene, located in a risk area (Fig  
172 S1B; S7Table), that was also previously associated with T2D in human islets [36]. PRKAA1  
173 (AMPK); MTHFD1; the Cdk2 regulators (CDKN1B, CCNE1); a V-ATPase subunit  
174 (ATP6VA1); the small GTPase Rab1a, Rab1b and Rab8a; several coat components; the  
175 putative tyrosine phosphatase DNAJC6; ACTB and TUBA also fall into this category  
176 (S9Table, candidates). IREP is also enriched in genes associated with the T2D risk with 15  
177 of the 184 validated DAGs from the human genome being identified indicating a nonrandom  
178 concentration of diabetes genes variants during IR endocytosis (p-value of  $3.44 \times 10^{-4}$ ;  
179 hypergeometric test) (S4Table, sheet IREP-HUGO).  
180 Collectively, IREP consists of more than 20% (15 validated DAGs from the T2D-  
181 protomodule and 101 candidates) of gene products confidently associated with the T2D risk.

182

### 183 **The insulin receptor-containing endosome network (IREN) displays a type-2 diabetes** 184 **disease module architecture.**

185 A disease module can be defined as a connected subnetwork showing mechanistic evidence  
186 for a phenotype [16, 17]. To identify the molecular mechanisms associated with IREP, we  
187 constructed a PPIN of IR-containing endosomes. The cytoHubba algorithm was used to  
188 compute and to rank nodes in the network [37]. The resulting collated PPIN is formed by  
189 313 nodes and 1147 edges (55% of IREP proteins; named IREN, Insulin Receptor  
190 Endosome Network). The general topology of IREN is based on few major hubs, with the  
191 kinase Cdk2 displaying the highest centrality. Relatively large nodes represented by the IR  
192 itself, proteins of the actin cytoskeleton (ACTB), and those involved in vesicular  
193 trafficking (CAV1) were observed. More peripheral nodes were also present as follows:  
194 coats (GOLGA2, CLTC), V-ATPase subunits (ATP6V1A), and cargos (APOA1) (Fig 3  
195 and S5Table, sheet IREN).

196 From the 101 high-confidence candidates (Tables 1 and S9Table) and 15 of the 184  
197 validated DAGs identified in IREP, 94 of the candidates and 10 of the DAGs are present  
198 in IREN. They form a single-connected subnetwork of 94 nodes with 330 interactions (Fig  
199 3 and S5Table). To test whether this module could arise by chance in the context of IR  
200 endocytosis, we made random reiterations of any 94 nodes of IREN. The results showed  
201 that the subnetwork is robust (empirical p-value  $< 10^{-4}$ ; Fig S2). Its collective influence  
202 was analyzed by expanding it to the first adjacent nodes. This resulted in a connected  
203 network of 271 nodes (88% of nodes) and 1070 out of 1147 IREN interactions (Figs 3 and  
204 S3), coverage that is largely more than expected by chance (p-value  $< 10^{-4}$ , Fig S2). GO  
205 analysis also revealed an enrichment for vesicle transport ( $p < 1.85 \times 10^{-51}$ ) and response  
206 to oxygen species ( $p < 8.52 \times 10^{-20}$ ), with the most enriched cell components being  
207 endosomes ( $p < 7.00 \times 10^{-25}$ ), Golgi apparatus ( $p < 1.77 \times 10^{-27}$ ) and endoplasmic reticulum  
208 ( $p < 2.13 \times 10^{-23}$ ), showing that the T2D-protomodule expansion coincides with a  
209 functional expansion (Fig 3 and S5Table, sheet IREN, GO analysis). Of the 94 of the 101  
210 high-confidence candidates in IREP, 94 have credible tyrosine phosphorylation motifs with  
211 the IREN kinases (Table 1 and S9, S10 Tables). Of the 87 present in IREN, 71 have at least  
212 one of their kinase-substrate interactions confirmed in IREN (Fig 3 and S10Table), further

213 emphasizing the mechanistic association. Taken together, these results indicate that IREN  
214 is a T2D-disease module.

215

### 216 **Candidate hub Cdk2 regulates the association of IR with microtubules.**

217 A prerequisite in the description of interaction maps is the validation of hubs in terms of  
218 perturbation responses. We then tested examples here of hub complexes in term of insulin  
219 response. We verified first whether Cdk2, which displays the highest centrality and is a  
220 high-confidence candidate (Table 1 and S1A Fig), is indeed associated with key elements.  
221 Microtubules, for instance, rely on dimerization of tubulin subunits alpha and beta for their  
222 assembly and the association of internalized cargos to microtubules has been associated to  
223 late events of trafficking. We noticed that the tubulin alpha subunit (TUBA), a reported  
224 substrate for the IR [38, 39], is preponderant within the IREN (Fig 3). We show that TUBA  
225 indeed readily associates with the IR after insulin stimulation in HEK293 cells, while  
226 TUBB has a different profile (Fig 4A). In addition, the association was nearly abolished  
227 upon Cdk2 overexpression, confirming the presence of complexes and that Cdk2 presence  
228 has the capacity to regulate interactions within IREN (Fig 4A).

229

### 230 **PTPLAD1 expression regulates the IR autophosphorylation activity and association 231 with Cdk2, Rab5c, Rab11a and actin.**

232 Compared with Cdk2, PTPLAD1 is an example of good centrality, but it is poorly studied  
233 and identified as a moderate candidate (S9 Table and Fig 3). Because the fatty acid  
234 elongation enzymatic activity was not confirmed, it was recently hypothesized that  
235 PTPLAD1 (HACD3) is involved in the elongation of specialized forms of 3-OH acyl-  
236 CoAs, such as those containing a short or branched alkylic chain [40]. An interaction with  
237 Rac1 was also reported [41]. PTPLAD1 has a well-positioned conserved cysteine C(X)5K  
238 motif in the soluble cytosolic loop, residues 257-279, and its partial deletion in cultured  
239 HEK293 cells coincided with IR tyrosine hyper-phosphorylation [15]. We verified whether  
240 PTPLAD1 acts on IR tyrosine phosphorylation outside a whole-cell context. We used an  
241 in vitro assay, whereby IR-loaded endosomes were incubated in the presence of ATP. We  
242 observed that a prior siRNA-mediated depletion in rat PTPLAD1 nearly abolished the  
243 PTPLAD1 presence from isolated endosomes, which coincided with a marked increase in  
244 IR autophosphorylation, demonstrating that the IR tyrosine-phosphorylated state is  
245 modified by PTPLAD1 (Fig 4B right panels). Low, but consistent, enzymatic activity  
246 towards the artificial substrate pNPP was measured (Fig 4B left panel) resembling the loss  
247 of PTP activity towards the IR observed previously observed after membrane solubilization  
248 [42]. In accordance with these results, and with prior PTPLAD1 depletion experiments  
249 [15], we observed that overexpression of PTPLAD1 in HEK293 cells markedly decreases  
250 the IR tyrosine-phosphorylated state (Fig 4C). Of further interest, the candidate Rab5c  
251 (Table 1) also associates with the IR and this association increases in an insulin-regulated  
252 manner upon PTPLAD1 overexpression (Fig 4C). Rab5a and b are well documented as  
253 playing a role in the early events of EGFR endocytosis but the role of Rab5c remains  
254 unclear [43]. Rab5c may therefore be particularly important for IR action as we noted the  
255 presence of an IR phosphorylation motifs located in the GTP binding site (Y83) (S10 Table)  
256 that resembles an inhibitory feedback loop described previously for Rab24 [44]. In support  
257 of this finding, we detected Rab5c and Cdk2, but not Rab11a, in anti-phosphotyrosine  
258 affinity complexes, and this association was abolished after PTPLAD1 overexpression (Fig

259 4C). In addition, both IR and Rab5c were present in Cdk2 affinity complexes, and this  
260 association decreased following PTPLAD1 overexpression (Fig 4C). To further test the  
261 importance of PTPLAD1 on IR routing, we verified and noticed an insulin-dependent  
262 association of IR with Rab11a, a known marker of endosomal recycling [22]. This supports  
263 a role for PTPLAD1 in cycling from endosomes to the plasmamembrane (PM). On another  
264 hand, we confirmed that under the same circumstances PTPLAD1 deletion, using siRNA,  
265 increases IR tyrosine phosphorylation and the presence of actin in IR immunoprecipitates  
266 (Fig 4D) [15].

267 We observed an insulin-dependent recruitment of the Rab- interacting lysosomal protein  
268 (RILP) in IR immunoprecipitates that was nearly abolished by PTPLAD1 deletion (Fig  
269 4D). RILP was demonstrated to be required for EGFR confinement and degradation in late  
270 endosome compartments [45] and is an inhibitor of V-ATPase activity [46]. This supports  
271 the idea of a key role for PTPLAD1 in early events of IR internalisation and recycling via  
272 RAB5c, Rab11a and actin cytoskeleton elements. Collectively, the data support the  
273 presence of dynamic insulin-dependent interactions for Cdk2 between the IR, PTPLAD1,  
274 Rab5c, Rab11a, tubulin and actin cytoskeletons whereby PTPLAD1 controls IR tyrosine  
275 phosphorylation and sorting.

276 To verify the idea that cell cycle components have expanded their action on endocytic  
277 traffic, we verified whether the protein MAD2, which binds to the MAD2-interacting motif  
278 (MIM) located in the carboxyterminal domain of the IR  $\beta$ -subunit during clathrin-mediated  
279 endocytosis [47], is responsive to insulin at the cell surface. The results demonstrate that  
280 MAD2 readily disappears from the PM fractions following IR tyrosine kinase activation  
281 (Fig 4E), thus supporting the idea that cells use cell cycle regulators for both early [47] and  
282 later events of IR endocytosis.

283

#### 284 **Inhibition of V-ATPase shifts the IR accumulation in endosomes in vivo**

285 V-ATPase subunits are well represented in IREP (Fig 1 and S1Table), forming large, more  
286 peripheral nodes in IREN (Fig 3) with ATP6V1A being identified here as moderate  
287 candidate (S9Table) for type 2 diabetes risk. It was previously demonstrated that V-ATPase  
288 inhibition decreases IR recycling to the plasma membrane in cultured hepatocytes [48]. We  
289 thus verified whether the kinetics of IR endocytosis are affected in vivo after treatments  
290 with two different potent V-ATPases inhibitors. We observed that the peak of IR  
291 accumulation in endosomes is markedly shifted towards later stages of endocytosis  
292 following either concanamycin A or bafilomycin A1 pretreatments as demonstrated by  
293 immunoblotting and hexokinase activity measurements (Fig 5A). Concanamycin A does  
294 not affect IR tyrosine phosphorylation in vitro, suggesting that V-ATPase inhibitors do not  
295 inadvertently function through PTPs inhibition (Fig 5B left panel). We noted however a  
296 strong and consistent threonine phosphorylation signal that was readily abolished by  
297 concanamycin A (Fig 5B right panel), suggesting the presence of additional feedback loop  
298 layers, which have yet to be characterized, informing the cell that the luminal acidification  
299 process is optimized. We verified whether V-ATPases elements contains IR  
300 phosphorylation motifs. The kinase network analysis indicated that ATP6V1A (S9Table)  
301 and ATP6V1E1 are indeed strong candidate substrates for the IR as well as for Cdk2 and  
302 AMPK (PRKAA1) (Fig 5C and S10Table).

303

304



## 305 Discussion

306 Using a combination of cell fractionation and computational approaches, we found a T2D  
307 disease module in IR-containing endosomes. The starting point of our analysis was a list of  
308 seed genes with established genetic T2D association and high GWAS p-values ( $1 \times 10^{-8}$ )  
309 against the background of random variation. They carry enough information to build a robust  
310 T2D-protomodule (Fig 2). The functional specialization of the T2D-protomodule also found  
311 in IREN (Fig 3) is in accord with the connection of these processes (protein transport,  
312 transcriptional factors and response to oxygen) in insulin action [1, 2]. The topological  
313 features of a scale-free network, with the view that hubs with the highest influence represent  
314 important points in biological networks [16, 37], coupled with the large enrichment in T2D  
315 genetic risk is particularly well represented by Cdk2 (Fig 3, Table 1). Cdk2 regulators were  
316 independently and repeatedly reported by GWAS and their role, with many other common  
317 variants, was interpreted more in terms of insulin production and secretion indicating that  
318 the beta-cell is a more appropriate place to find a T2D-disease module [11, 13, 49, 50].  
319 Indeed, mice lacking Cdk2 are viable [51, 52] and targeted Cdk2 deletion in the pancreas  
320 induces glucose intolerance primarily by affecting glucose-stimulated insulin secretion [53].  
321 Similar to endosomes, the secretory pathway consists of multiple dynamic compartments  
322 linked via anterograde and retrograde transport [54, 55]. The T2D-disease module thus can  
323 be co-functional in endosomes and insulin-secreting cells. In this regard, in the liver the  
324 presence of insulin-regulated Cdk2/cyclinE/p27<sup>kip1</sup> complexes having a capacity to inhibit  
325 hybrid endosome formation in vitro has been previously reported [56].  
326 In contrast with Cdk2, PTPLAD1 has less topological influence in IREN and is a less-  
327 studied protein. PTPLAD1 is, however, functionally well connected, as the control of IR  
328 activity may be achieved at several endosomal targets by PTPLAD1 that, together with  
329 Cdk2, seems to have a considerable local influence on actin and microtubule networks, Rabs  
330 and V-ATPase. The finding that IR complexes are under the control of PTPLAD1 would  
331 also be particularly important, because PTPLAD1 mobilization in response to insulin inputs  
332 has also interesting consequences by favoring tyrosine phosphorylated-IR quanta formation,  
333 which is considered as an emergent property of endosomes as signaling devices [5]. This  
334 PTP activity is yet to be fully characterized and can be supported elsewhere in the cell by  
335 the small fraction of the endoplasmic reticulum-associated PTP-1B with high specific  
336 activity that can reach the plasmamembrane at specific points of cell-cell contact [57], by  
337 cytosolic PTPs (SHP1/2) (Fig 2, Table 1) that couple to RTK phosphorylation in a negative  
338 feedback manner at the PM with longer delays [58], and by PTPRs that are thought to display  
339 low specific activity towards basal RTK autophosphorylation activities occurring at the cell  
340 surface [59]. Through a concerted action on microtubules and actin elements IREN supports  
341 a model in which Cdk2 controls the microtubules-based traffic, and PTPLAD1 is an insulin-  
342 dependent switch deciding the choice of IR interaction with microtubules versus actin  
343 routing events (Fig 4). Interesting times are ahead for investigating insulin responses in the  
344 context of IREN. The question arises as to the extent of crosstalk between the IR-Tyr kinase  
345 and the predominantly Ser/Thr kinases (Cdk2, AMPK) that drive IR trafficking and  
346 signaling, and when and where this crosstalk occurs. Apart from the presence of multiple  
347 high-confidence substrates for Cdk2 and AMPK in IREN, the current results strongly point  
348 to the internalized IR as a relatively pleiotropic *writer* in the disease module (Tables 1 and  
349 S9, S10 Tables; For example, ATP6V1E1: Y-464; AMPK: Y-247; ATIC: Y-151; Rab5c:  
350 Y-83) and PTPLAD1 as the insulin-dependent *eraser* with short delay. A related challenge

351 will be systematically matching these phosphor-sites to their cognate physiological *readers*  
352 [60].

353 Another connected example of the IR regulatory mechanism associated with the T2D  
354 genetic risk concerns the marked effect of the proton pumping activity on IR trafficking in  
355 vivo (Fig 5). A concrete problem for the cell concerns the energy sources, and it seems that  
356 an efficient solution was found to connect IR activity with intermediary metabolism and  
357 trafficking by linking V-ATPase subunits (continuous energy demand) with AMPK (energy  
358 sensor and action on IR trafficking) and the metabolic enzyme ATIC (ATP production) (Fig  
359 5) further supporting the idea of the presence of an IR/ATIC/AMPK/PTPLAD1 circuit [15,  
360 61]. The decreased presence of ATIC homodimers, using a small interface interactor, indeed  
361 activates AMPK and improve glucose intolerance in a mouse model [62]. We also noted the  
362 presence of related candidate enzyme, MTHFD1 (Fig 3 and S9Table: PPIN, GWAS, co-  
363 expression). The fact that V-ATPase controls the activity of AMPK [63] emphasizes the  
364 idea that all the conditions are present in IREN to auto-regulate this node and thus IR routing,  
365 signaling and hepatic clearance in relation to global cell energy status. The presence of the  
366 V-ATPase inhibitor RILP [46] in IR immunoprecipitates, which was nearly abolished by  
367 PTPLAD1 deletion (Fig 4D), further supports the idea that PTPLAD1 has a large capacity  
368 for action to decide IR routing towards early versus late compartments [45].

369 A facet of IR trafficking in endosomes that can affect indirectly insulin production and  
370 secretion is the insulin dissociation/degradation sequence in endosomes, which supports  
371 efficient hepatic insulin clearance [3, 32]. A reduction in hepatic insulin clearance is viewed  
372 as an adaptive mechanism that relieves the burden on pancreatic beta-cells [8, 64]. On the  
373 other hand, as shown by a mouse model, moderate chronic hyperinsulinemia can be the  
374 primary mechanism resulting in insulin resistance [65]. The idea that the complex genetic  
375 heterogeneity converges towards a single module co-functional in insulin-producing and  
376 target cells, implies a mechanistic promiscuity between insulin signaling, transport and  
377 production, that can explain the prevalence of insulin clearance in insulin sensitivity found  
378 in some animal models [66].

379 We acknowledge that some endosomal structures might not be accessible to the IR  $\beta$ -subunit  
380 antibody and the limitations inherent to the fractionation approaches such as true tubular  
381 connection between different organelles versus contaminants [19, 67]. Nonetheless, the  
382 present IREN helps us narrow the search space of the full organism interactome and focus  
383 a search in a well-localized network neighborhood. Quantitative proteomic approaches are  
384 needed to establish how changes in endosomes occur in space and time according to low  
385 (around 10 % saturating) versus large saturating insulin doses (50 % saturating here). This  
386 will provide a more complete picture of IREN dynamics that takes the in vivo polarized  
387 situation into account [7].

388 In conclusion, our results establish that the endosomal apparatus contains a T2D disease  
389 module located in close proximity to the IR. It senses the state of IR activation and seems  
390 co-functional with insulin secretion and islets biology. It helps to explain disease  
391 heterogeneity and represents a valuable new resource to understand insulin action and to  
392 classify related metabolic traits. Rewiring a network, distorted under the combined genetic  
393 and environmental pressures, with designed surface interactors [33], provides a mechanistic  
394 rationale for the exploration of personalized medicine and elaborate new necessary drugs  
395 [1, 2, 68].

396

## 397 **Methods**

398 *Cell Fractions*- Harlan Sprague-Dawley rats (female 120-140 g, b.w.) were purchased from  
399 Charles River Ltd. (St. Constant, Québec, Canada) and were maintained under standard  
400 laboratory conditions with food and water available *ad libitum*, except that the food was  
401 removed 18 hours before the experiments. All animal procedures were approved by the  
402 CPA-CRCHUQ (certificate 055-3). The G/E and the PM fractions were prepared and  
403 characterized in terms of enzyme markers, electron microscopy (EM) and ligand-mediated  
404 endocytosis, as originally described [3]. The G/E fraction was also characterized in terms of  
405 proteomic survey and construction of the protein interaction network (GEN) [15]. IR-  
406 immuno-enriched endosomes were prepared as originally depicted [19], starting from the  
407 mixed hepatic Golgi/endosomal (G/E) fraction with only minor modifications [20].  
408 Dynabeads (Dynal-A, Invitrogen, San Francisco, CA, USA) that were pretreated with 0.1%  
409 BSA and coated with the anti-IR  $\beta$ -subunit antibody were incubated with freshly prepared  
410 G/E fractions (10 mg of protein) for 1 hour at 4°C under gentle agitation. Beads were then  
411 rapidly rinsed before being subjected to EM, immunoblotting and mass spectrometry (MS)  
412 analysis. There was no major differences in the size and morphology of the vesicles  
413 immuno-isolated after 2 minutes or after 15 minutes of stimulation. They were relatively  
414 homogeneous with a diameter of 70-200 nm and some tubular elements.

415  
416 *Protein in-gel digestion*- Beads were washed 3 times with 50 mM ammonium bicarbonate  
417 buffer. They were suspended in 25  $\mu$ l of 50 mM ammonium bicarbonate, following which  
418 trypsin (1  $\mu$ g) was added. Proteolysis was done at 37°C and stopped by acidification with  
419 3% acetonitrile-1% TFA-0.5% acetic acid. Beads were removed by centrifugation, and  
420 peptides were purified from the supernatant by stage tip (C18) and vacuum dried before MS  
421 injection. Samples were solubilized into 10  $\mu$ l of 0.1% formic acid and 5  $\mu$ l was analyzed  
422 by mass spectrometry [69].

423  
424 *Mass spectrometry*- Peptide samples were separated by online reverse-phase (RP) nanoscale  
425 capillary liquid chromatography (nanoLC) and analyzed by electrospray mass spectrometry  
426 (ES MS/MS). The experiments were performed with an Agilent 1200 nano pump connected  
427 to a 5600 mass spectrometer (AB Sciex, Framingham, MA, USA) equipped with a  
428 Nanoelectrospray ion source. Peptide separation occurred on a self-packed PicoFrit column  
429 (New Objective, Woburn, MA) packed with Jupiter (Phenomenex, Torrance, CA) 5  $\mu$ l,  
430 300A C18, 15 cm x 0.075 mm internal diameter. Peptides were eluted with a linear gradient  
431 from 2-30% solvent B (acetonitrile, 0.1% formic acid) in 30 minutes at 300 nl/min. Mass  
432 spectra were acquired using a data-dependent acquisition mode using Analyst software  
433 version 1.6. Each full scan mass spectrum (400 m/z to 1250 m/z) was followed by collision-  
434 induced dissociation of the twenty most intense ions. Dynamic exclusion was set for a  
435 period of 3 sec and a tolerance of 100 ppm. All MS/MS peak lists (MGF files) were  
436 generated using Protein Pilot (AB Sciex, Framingham, MA, USA, Version 4.5) with the  
437 paragon algorithm. MGF sample files were then analyzed using Mascot (Matrix Science,  
438 London, UK; version 2.4.0). MGF peak list files were created using Protein Pilot version  
439 4.5 software (ABSciex) utilizing the Paragon and Progroup algorithms. (Shilov). MGF  
440 sample files were then analyzed using Mascot (Matrix Science, version 2.4.0) [70], and  
441 rodent databases (S1Table). The number of newly identified proteins plateaued at

442 approximately 10-20% of total for the second and third experiments, indicating that we were  
443 close to the completion point with this method [71] (S3Fig).

444

445 *Databases and network analyses*- Conversion to human orthologs was performed using the  
446 InParanoid8 database. The PPIN was generated from a listing of protein-coding genes  
447 generated and named according to HUGO database nomenclature. Proteins found to be  
448 associated with IR in hepatic endosomes were included in the analysis: ATIC, PTPLAD1,  
449 SHP1, CDK2, PLVAP1, CDKN1B and CCNE1. The interactions were curated using Y2H  
450 binary interactions of the CCSB human interactome, physical complexes and direct  
451 interactions from Intact, Database of Interacting Protein (DIP, UCLA), REACTOME,  
452 HITPREDICT and HINT databases, affinity complexes from BIOGRID and HPRD  
453 databases. Proteins having nonspecific interactions such as chaperones, ribosomal (RPL  
454 family) proteins, ubiquitylation and sumoylation processes (UBC, CUL), elongation factors  
455 were removed [72, 73]. The Cytoscape platform (Version 3.2.0) was used for network  
456 visualization [34]. Self-loops and duplicated edges were removed prior the analyses. The  
457 cytoHubba algorithm was used to compute and rank nodes according to their centrality  
458 « Betweenness and Connectivity » scores in the network [37, 72, 74] (S5Table). Cellular  
459 component grouping and functional analysis were performed after a gene ontology analysis  
460 with the Biological Networks Gene Ontology tool (*BINGO version 2.44*). Kinase predictions  
461 were performed with GPS 3.0 [75], phosphosites [76] and NetworKIN [77] version 3.0  
462 (KinomeXplorer) using the high-throughput workflow option. Data from GPS 3.0 were  
463 additionally filtered by a differential score (difference between Score and Cut of) higher or  
464 equal to 1.0. Networking associations were considered if the Networkin score was observed  
465 to be higher than 2.0. Analyses were performed on November 10 2017.

466

467 Candidate gene analysis and identification:

468 *GO analysis*- We verified the probability of intracellular colocalization for candidates  
469 and seeds using the plugin BINGO adapted for the Cytoscape platform. We clustered  
470 the hybrid network (S4Figure) based on enrichment in the same cellular compartment  
471 by GO. In IREP proteins coming from Golgi-endosomal fractions, 21 seeds were found  
472 to be enriched in the Golgi apparatus ( $p < 5.6822 \times 10^{-14}$ , after correction) and  
473 endosomes ( $p < 1.1315 \times 10^{-16}$ , after correction). Of the 126 IREP candidates identified  
474 by PPIN, 32 have at least three interactors among the 21 Golgi-endosomal seeds. The  
475 analysis was expanded to other compartments with 7 candidates interacting each with  
476 three seeds in the cytosol cluster ( $p < 6.8728 \times 10^{-17}$ , after correction), 10 candidates in  
477 the endoplasmic reticulum ( $p < 1.6173 \times 10^{-12}$ , after correction), 25 in the  
478 plasmamembrane ( $p < 5.6570 \times 10^{-8}$ , after correction), and 13 in the extracellular region  
479 ( $p < 4.6024 \times 10^{-5}$ , after correction). Taken together, 54 nonredundant IREP coding  
480 genes among the 126 identified by PPIN were found to be colocalized with validated  
481 seeds based on GO analysis (S5Fig and S6Table).

482 *Fine-mapping approach*- We performed a linkage disequilibrium (LD) analysis and  
483 identified proximal SNPs correlated to diabetes GWAS signals ( $p \leq 10^{-3}$ ) using  
484 replicated data as displayed in tables from the Wellcome Trust Case Control Consortium  
485 (WTCCC), GWAS Central portal, GWAS catalog or DIAGRAM GWAS-MetaboChip  
486 or trans-ethnic data. This analysis provided a list of 130 IREP coding genes falling in  
487 genomic loci reliably associated with diabetes (S7Table).

488 *Genes expression analysis*- Most of the SNPs identified by GWAS are intergenic or fall in  
489 intronic regions of genes suggesting a regulatory role [9, 11]. Among the 130 candidates  
490 identified by fine-mapping, we verified which ones had SNPs experimentally shown to  
491 affect gene expression and to likely regulate some transcription factor binding as described  
492 in category-1 of high-confidence associations in the RegulomeDB database [78]. We  
493 identified 15 IREP coding genes fulfilling these criteria, consequently forming a first pool  
494 of IREP candidates based on gene expression regulation (Table S8). A second pool was  
495 made-up of IREP genes showing or predicted to have similar patterns of expression with  
496 at least three of the 184 seeds by RNA-Seq analysis and simultaneously sharing regulatory  
497 binding motifs either for transcription factors or for miRNA. The candidates and seeds  
498 pairs were considered coexpressed if they were mutually ranked among the top 1% of  
499 coexpressed genes pairs by the Genefriends database [79]. The transcription factor targets  
500 (TFTs) or microRNA targets were analyzed using the top 10 grouping of the Gene Set  
501 Enrichment Analysis [80, 81] with ( $p < 4.35 \times 10^{-16}$  after correction for TFTs and  $p < 2.88$   
502  $\times 10^{-6}$  for miRNA targets). In all, 296 IREP coding genes were found to share TFTs with  
503 at least three diabetes genes compared with 112 for miRNA targets and 109 for RNA-Seq.  
504 Only 80 genes from the RNA-Seq analysis were considered for the second pool of  
505 candidates because they simultaneously showed some shared binding targets with at least  
506 three DAGs for TFs (72 genes) and/or for miRNA (28 genes). Taken together, 94  
507 nonredundant IREP coding genes from the first and second pools are considered candidates  
508 based on shared regulatory elements with validated DAGs (S8Table).  
509

510 *IR endosomal autophosphorylation*- IR endosomal autophosphorylation was measured as  
511 previously reported [42] with minor modifications [15]. *SiRNA in vivo*: Rats were injected  
512 via the jugular vein with a scrambled or predesigned stabilized rat PTPLAD1 sequence (100  
513 mg/100 g bw; IVORY in vivo siRNA GGGGCAGUCUAAUUCGGUGUGCU, D-00203-  
514 0200-V; purified/desalted by RP/IEX-HPLC; Riboxx Life Sciences, Germany; Liver *In vivo*  
515 transfection reagent 5061, Altogen Biosystems, Las Vegas, CA) 48 and 24 hours before  
516 isolating the G/E fraction. The PTPLAD1 mRNA expression level was measured against  
517 GAPDH in liver sections using quantitative polymerase chain reaction (qPCR) and was  
518 decreased by 52 +/- 6.2%, n=3.

519 *Cell culture and analysis*- HEK293 cells were maintained in DMEM high-glucose medium  
520 with 10% foetal bovine serum. PTPLAD1 siRNA knockdown was performed as previously  
521 described [15] using the predesigned human sequence as follows:  
522 GACCCAGAGGCAGGUAACAUAUACA NM\_016395\_STEALTH\_367. Cells were  
523 transfected using Lipofectamine 2000<sup>TM</sup> (Life Technologies) for 48 hours and subjected to  
524 the described experiments. For overexpression experiments PTPLAD1 WT and Cdk2 WT  
525 were cloned into the pcDNA3 expression vector. Transfection was performed with  
526 Lipofectamine 2000<sup>TM</sup> and plasmid DNA (300 ng/ml). Cells were preincubated at 37 °C  
527 without serum for 5 hours before insulin (35 nM) stimulation for the indicated times.  
528 Immunoprecipitation (IP) were done under solubilization conditions that preserve the  
529 integrity of insulin-dependent complexes (Empigen BB 0.3%, 2 hours, 4°C) [20].  
530

531 *Reagents and antibodies*- Porcine insulin (I5523) was obtained from Sigma-Aldrich (St.  
532 Louis, MO, USA). The following antibodies were used: anti-phosphotyrosine (PY20,  
533 Sigma-Aldrich, St. Louis, MO, USA). The IR  $\beta$ -subunit (Sc-711), Rab5c (sc-365667) and

534 Cdk2 (sc-163, sc-163AC) antibodies were obtained from Santa Cruz Biotechnology (Santa  
535 Cruz, CA, USA). The anti-PTPLAD1 was from Abcam (ab57143, Cambridge MA, USA).  
536 The anti-tubulin antibodies were obtained from Sigma-Aldrich (T5168, TUB 2.1, St. Louis,  
537 MO, USA). The anti-MAD2 was from Bethyl Laboratories (Montgomery, TX, USA). The  
538 RILP antibody was from Invitrogen (PA5-34357, Waltham, MA, USA). The generic anti-  
539 phosphothreonine was from Zymed (San Francisco, CA, USA). The antibody against  
540 Rab11a was from ThermoFisher Scientific (Rockford, IL, USA). Peroxidase-conjugated  
541 secondary antibodies were used (1:10,000, Jackson Immuno Research Laboratories, West  
542 Grove, PA, USA). Membranes (PVDF) were analyzed using a chemiluminescence kit (ECL,  
543 Perkin Elmer Life science, Boston, MA) or using an ImageQuant LAS 40 000 imager (GE  
544 Healthcare Biosciences, Baie d'Urfé, QC, CA). [ $\gamma$ -<sup>32</sup>P]-ATP (1000-3000 Ci/mmol) was  
545 from New England Nuclear Radiochemicals (Lachine, Québec). Other chemicals and  
546 reagents were of analytical grade and were purchased from Fisher Scientific (Sainte-Foy,  
547 Québec, CAN) or from Roche Laboratories (Laval, Québec, CAN).

548

549

550 **Acknowledgements:** We thank Dr Christian R. Landry (Université Laval) for critical  
551 comments.

552 **Author contributions:** Conceptualization, M. B-D, R. F.; Methodology, M. B-D, P. B., S.  
553 B., A. D., S. F., R. F.; Investigation, M.B -D, N. B., S. B., S. F., S. E.; Writing- Original  
554 draft, M. B -D; Writing-review and editing, R.F., S. E.; Funding acquisition, R. F.

555 **Competing interests:** The authors declare that they have no competing interests.

556

557

## 558 **References**

559

560 1. Boucher J, Kleinridders A, Kahn CR. Insulin receptor signaling in normal and  
561 insulin-resistant states. *Cold Spring Harb Perspect Biol.* 2014;6(1). Epub 2014/01/05. doi:  
562 6/1/a009191 [pii]

563 10.1101/cshperspect.a009191. PubMed PMID: 24384568; PubMed Central PMCID:  
564 PMC3941218.

565 2. Haeusler RA, McGraw TE, Accili D. Biochemical and cellular properties of insulin  
566 receptor signalling. *Nat Rev Mol Cell Biol.* 2017. doi: 10.1038/nrm.2017.89. PubMed  
567 PMID: 28974775.

568 3. Bergeron JJ, Di Guglielmo GM, Dahan S, Dominguez M, Posner BI. Spatial and  
569 Temporal Regulation of Receptor Tyrosine Kinase Activation and Intracellular Signal  
570 Transduction. *Annu Rev Biochem.* 2016. Epub 2016/03/30. doi: 10.1146/annurev-  
571 biochem-060815-014659. PubMed PMID: 27023845.

572 4. Goh LK, Sorkin A. Endocytosis of receptor tyrosine kinases. *Cold Spring Harb*  
573 *Perspect Biol.* 2013;5(5):a017459. Epub 2013/05/03. doi: 5/5/a017459 [pii]  
574 10.1101/cshperspect.a017459. PubMed PMID: 23637288.

575 5. Villasenor R, Kalaidzidis Y, Zerial M. Signal processing by the endosomal system.  
576 *Curr Opin Cell Biol.* 2016;39:53-60. doi: 10.1016/j.ceb.2016.02.002. PubMed PMID:  
577 26921695.

578 6. Bergeron JJ, Di Guglielmo GM, Dahan S, Dominguez M, Posner BI. Spatial and  
579 Temporal Regulation of Receptor Tyrosine Kinase Activation and Intracellular Signal

- 580 Transduction. *Annu Rev Biochem.* 2016;85:573-97. Epub 2016/03/30. doi:  
581 10.1146/annurev-biochem-060815-014659. PubMed PMID: 27023845.
- 582 7. Zeigerer A, Wuttke A, Marsico G, Seifert S, Kalaidzidis Y, Zerial M. Functional  
583 properties of hepatocytes in vitro are correlated with cell polarity maintenance. *Exp Cell*  
584 *Res.* 2016. doi: 10.1016/j.yexcr.2016.11.027. PubMed PMID: 27916608.
- 585 8. Samuel VT, Shulman GI. Mechanisms for insulin resistance: common threads and  
586 missing links. *Cell.* 2012;148(5):852-71. Epub 2012/03/06. doi: S0092-8674(12)00217-6  
587 [pii]  
588 10.1016/j.cell.2012.02.017. PubMed PMID: 22385956; PubMed Central PMCID:  
589 PMC3294420.
- 590 9. Prasad RB, Groop L. Genetics of type 2 diabetes-pitfalls and possibilities. *Genes*  
591 *(Basel).* 2015;6(1):87-123. doi: 10.3390/genes6010087. PubMed PMID: 25774817;  
592 PubMed Central PMCID: PMCPMC4377835.
- 593 10. Fuchsberger C, Flannick J, Teslovich TM, Mahajan A, Agarwala V, Gaulton KJ, et  
594 al. The genetic architecture of type 2 diabetes. *Nature.* 2016. Epub 2016/07/12. doi:  
595 nature18642 [pii]  
596 10.1038/nature18642. PubMed PMID: 27398621.
- 597 11. Visscher PM, Wray NR, Zhang Q, Sklar P, McCarthy MI, Brown MA, et al. 10  
598 Years of GWAS Discovery: Biology, Function, and Translation. *Am J Hum Genet.*  
599 2017;101(1):5-22. doi: 10.1016/j.ajhg.2017.06.005. PubMed PMID: 28686856; PubMed  
600 Central PMCID: PMCPMC5501872.
- 601 12. Dimas AS, Lagou V, Barker A, Knowles JW, Magi R, Hivert MF, et al. Impact of  
602 type 2 diabetes susceptibility variants on quantitative glycemic traits reveals mechanistic  
603 heterogeneity. *Diabetes.* 2014;63(6):2158-71. doi: 10.2337/db13-0949. PubMed PMID:  
604 24296717; PubMed Central PMCID: PMCPMC4030103.
- 605 13. Hannou SA, Wouters K, Paumelle R, Staels B. Functional genomics of the  
606 CDKN2A/B locus in cardiovascular and metabolic disease: what have we learned from  
607 GWASs? *Trends Endocrinol Metab.* 2015;26(4):176-84. Epub 2015/03/07. doi: S1043-  
608 2760(15)00023-5 [pii]  
609 10.1016/j.tem.2015.01.008. PubMed PMID: 25744911.
- 610 14. Wood AR, Jonsson A, Jackson AU, Wang N, van Leewen N, Palmer ND, et al. A  
611 Genome-Wide Association Study of IVGTT-Based Measures of First-Phase Insulin  
612 Secretion Refines the Underlying Physiology of Type 2 Diabetes Variants. *Diabetes.*  
613 2017;66(8):2296-309. doi: 10.2337/db16-1452. PubMed PMID: 28490609; PubMed  
614 Central PMCID: PMCPMC5521867.
- 615 15. Boutchueng-Djidjou M, Collard-Simard G, Fortier S, Hebert SS, Kelly I, Landry  
616 CR, et al. The Last Enzyme of the De Novo Purine Synthesis Pathway 5-aminoimidazole-  
617 4-carboxamide Ribonucleotide Formyltransferase/IMP Cyclohydrolase (ATIC) Plays a  
618 Central Role in Insulin Signaling and the Golgi/Endosomes Protein Network. *Mol Cell*  
619 *Proteomics.* 2015;14(4):1079-92. Epub 2015/02/18. doi: M114.047159 [pii]  
620 10.1074/mcp.M114.047159. PubMed PMID: 25687571.
- 621 16. Barabasi AL, Gulbahce N, Loscalzo J. Network medicine: a network-based  
622 approach to human disease. *Nat Rev Genet.* 2011;12(1):56-68. Epub 2010/12/18. doi:  
623 nrg2918 [pii]  
624 10.1038/nrg2918. PubMed PMID: 21164525; PubMed Central PMCID: PMC3140052.

- 625 17. Sharma A, Menche J, Huang CC, Ort T, Zhou X, Kitsak M, et al. A disease module  
626 in the interactome explains disease heterogeneity, drug response and captures novel  
627 pathways and genes in asthma. *Hum Mol Genet.* 2015;24(11):3005-20. doi:  
628 10.1093/hmg/ddv001. PubMed PMID: 25586491; PubMed Central PMCID:  
629 PMC4447811.
- 630 18. Posner BI, Bergeron JJ. Assessment of internalization and endosomal signaling:  
631 studies with insulin and EGF. *Methods Enzymol.* 2014;535:293-307. Epub 2014/01/01.  
632 doi: B978-0-12-397925-4.00017-1 [pii]  
633 10.1016/B978-0-12-397925-4.00017-1. PubMed PMID: 24377930.
- 634 19. Jin M, Saucan L, Farquhar MG, Palade GE. Rab1a and multiple other Rab proteins  
635 are associated with the transcytotic pathway in rat liver. *J Biol Chem.* 1996;271(47):30105-  
636 13. Epub 1996/11/22. PubMed PMID: 8939959.
- 637 20. Fiset A, Xu E, Bergeron S, Marette A, Pelletier G, Siminovitch KA, et al.  
638 Compartmentalized CDK2 is connected with SHP-1 and beta-catenin and regulates insulin  
639 internalization. *Cell Signal.* 2011;23(5):911-9. Epub 2011/01/26. doi: S0898-  
640 6568(11)00020-9 [pii]  
641 10.1016/j.cellsig.2011.01.019. PubMed PMID: 21262353.
- 642 21. Rink J, Ghigo E, Kalaidzidis Y, Zerial M. Rab conversion as a mechanism of  
643 progression from early to late endosomes. *Cell.* 2005;122(5):735-49. Epub 2005/09/07.  
644 doi: S0092-8674(05)00697-5 [pii]  
645 10.1016/j.cell.2005.06.043. PubMed PMID: 16143105.
- 646 22. Welz T, Wellbourne-Wood J, Kerkhoff E. Orchestration of cell surface proteins by  
647 Rab11. *Trends Cell Biol.* 2014;24(7):407-15. Epub 2014/03/29. doi: S0962-  
648 8924(14)00033-6 [pii]  
649 10.1016/j.tcb.2014.02.004. PubMed PMID: 24675420.
- 650 23. Andersen JN, Del Vecchio RL, Kannan N, Gergel J, Neuwald AF, Tonks NK.  
651 Computational analysis of protein tyrosine phosphatases: practical guide to bioinformatics  
652 and data resources. *Methods.* 2005;35(1):90-114. Epub 2004/12/14. doi: S1046-  
653 2023(04)00175-6 [pii]  
654 10.1016/j.ymeth.2004.07.012. PubMed PMID: 15588990.
- 655 24. Ramachandran C, Aebersold R, Tonks NK, Pot DA. Sequential dephosphorylation  
656 of a multiply phosphorylated insulin receptor peptide by protein tyrosine phosphatases.  
657 *Biochemistry.* 1992;31(17):4232-8. Epub 1992/05/05. PubMed PMID: 1373652.
- 658 25. Hashimoto N, Feener EP, Zhang WR, Goldstein BJ. Insulin receptor protein-  
659 tyrosine phosphatases. Leukocyte common antigen-related phosphatase rapidly deactivates  
660 the insulin receptor kinase by preferential dephosphorylation of the receptor regulatory  
661 domain. *J Biol Chem.* 1992;267(20):13811-4. Epub 1992/07/15. PubMed PMID: 1321126.
- 662 26. Moller NP, Moller KB, Lammers R, Kharitonov A, Hoppe E, Wiberg FC, et al.  
663 Selective down-regulation of the insulin receptor signal by protein-tyrosine phosphatases  
664 alpha and epsilon. *J Biol Chem.* 1995;270(39):23126-31. Epub 1995/09/29. PubMed  
665 PMID: 7559456.
- 666 27. Shintani T, Higashi S, Takeuchi Y, Gaudio E, Trapasso F, Fusco A, et al. The R3  
667 receptor-like protein tyrosine phosphatase subfamily inhibits insulin signalling by  
668 dephosphorylating the insulin receptor at specific sites. *J Biochem.* 2015;158(3):235-43.  
669 Epub 2015/06/13. doi: mvv045 [pii]  
670 10.1093/jb/mvv045. PubMed PMID: 26063811.



- 671 28. Gall WE, Higginbotham MA, Chen C, Ingram MF, Cyr DM, Graham TR. The  
672 auxilin-like phosphoprotein Swa2p is required for clathrin function in yeast. *Curr Biol.*  
673 2000;10(21):1349-58. Epub 2000/11/21. doi: S0960-9822(00)00771-5 [pii]. PubMed  
674 PMID: 11084334.
- 675 29. Sousa R, Lafer EM. The role of molecular chaperones in clathrin mediated  
676 vesicular trafficking. *Front Mol Biosci.* 2015;2:26. Epub 2015/06/05. doi:  
677 10.3389/fmolb.2015.00026. PubMed PMID: 26042225; PubMed Central PMCID:  
678 PMC4436892.
- 679 30. Dubois MJ, Bergeron S, Kim HJ, Dombrowski L, Perreault M, Fournes B, et al.  
680 The SHP-1 protein tyrosine phosphatase negatively modulates glucose homeostasis. *Nat*  
681 *Med.* 2006;12(5):549-56. PubMed PMID: 16617349.
- 682 31. Tuomikoski T, Felix MA, Doree M, Gruenberg J. Inhibition of endocytic vesicle  
683 fusion in vitro by the cell-cycle control protein kinase cdc2. *Nature.* 1989;342(6252):942-  
684 5.
- 685 32. Duckworth WC, Bennett RG, Hamel FG. Insulin degradation: progress and  
686 potential. *Endocr Rev.* 1998;19(5):608-24. Epub 1998/10/30. PubMed PMID: 9793760.
- 687 33. Sahni N, Yi S, Taipale M, Fuxman Bass JI, Coulombe-Huntington J, Yang F, et al.  
688 Widespread macromolecular interaction perturbations in human genetic disorders. *Cell.*  
689 2015;161(3):647-60. Epub 2015/04/25. doi: S0092-8674(15)00430-4 [pii]  
690 10.1016/j.cell.2015.04.013. PubMed PMID: 25910212; PubMed Central PMCID:  
691 PMC4441215.
- 692 34. Doncheva NT, Assenov Y, Domingues FS, Albrecht M. Topological analysis and  
693 interactive visualization of biological networks and protein structures. *Nat Protoc.*  
694 2012;7(4):670-85. Epub 2012/03/17. doi: nprot.2012.004 [pii]  
695 10.1038/nprot.2012.004. PubMed PMID: 22422314.
- 696 35. Oti M, Snel B, Huynen MA, Brunner HG. Predicting disease genes using protein-  
697 protein interactions. *J Med Genet.* 2006;43(8):691-8. Epub 2006/04/14. doi:  
698 jmg.2006.041376 [pii]  
699 10.1136/jmg.2006.041376. PubMed PMID: 16611749; PubMed Central PMCID:  
700 PMC2564594.
- 701 36. Taneera J, Lang S, Sharma A, Fadista J, Zhou Y, Ahlqvist E, et al. A systems  
702 genetics approach identifies genes and pathways for type 2 diabetes in human islets. *Cell*  
703 *Metab.* 2012;16(1):122-34. doi: 10.1016/j.cmet.2012.06.006. PubMed PMID: 22768844.
- 704 37. Yu H, Kim PM, Sprecher E, Trifonov V, Gerstein M. The importance of  
705 bottlenecks in protein networks: correlation with gene essentiality and expression  
706 dynamics. *PLoS Comput Biol.* 2007;3(4):e59. Epub 2007/04/24. doi: 06-PLCB-RA-  
707 0302R2 [pii]  
708 10.1371/journal.pcbi.0030059. PubMed PMID: 17447836; PubMed Central PMCID:  
709 PMC1853125.
- 710 38. Kadowaki T, Fujita-Yamaguchi Y, Nishida E, Takaku F, Akiyama T, Kathuria S,  
711 et al. Phosphorylation of tubulin and microtubule-associated proteins by the purified  
712 insulin receptor kinase. *J Biol Chem.* 1985;260(7):4016-20. Epub 1985/04/10. PubMed  
713 PMID: 3920212.
- 714 39. Wandosell F, Serrano L, Avila J. Phosphorylation of alpha-tubulin carboxyl-  
715 terminal tyrosine prevents its incorporation into microtubules. *J Biol Chem.*  
716 1987;262(17):8268-73. Epub 1987/06/15. PubMed PMID: 3036806.

- 717 40. Sawai M, Uchida Y, Ohno Y, Miyamoto M, Nishioka C, Itohara S, et al. The 3-  
718 hydroxyacyl-CoA dehydratases HACD1 and HACD2 exhibit functional redundancy and  
719 are active in a wide range of fatty acid elongation pathways. *J Biol Chem.*  
720 2017;292(37):15538-51. doi: 10.1074/jbc.M117.803171. PubMed PMID: 28784662;  
721 PubMed Central PMCID: PMC5602410.
- 722 41. Courilleau D, Chastre E, Sabbah M, Redeuilh G, Atfi A, Mester J. B-ind1, a novel  
723 mediator of Rac1 signaling cloned from sodium butyrate-treated fibroblasts. *J Biol Chem.*  
724 2000;275(23):17344-8. Epub 2000/04/05. doi: 10.1074/jbc.M000887200  
725 M000887200 [pii]. PubMed PMID: 10747961.
- 726 42. Faure R, Baquiran G, Bergeron JJ, Posner BI. The dephosphorylation of insulin and  
727 epidermal growth factor receptors. Role of endosome-associated phosphotyrosine  
728 phosphatase(s). *J Biol Chem.* 1992;267(16):11215-21. PubMed PMID: 1375938.
- 729 43. Wandinger-Ness A, Zerial M. Rab proteins and the compartmentalization of the  
730 endosomal system. *Cold Spring Harb Perspect Biol.* 2014;6(11):a022616. Epub  
731 2014/10/25. doi: cshperspect.a022616 [pii]  
732 10.1101/cshperspect.a022616. PubMed PMID: 25341920.
- 733 44. Overmeyer JH, Maltese WA. Tyrosine phosphorylation of Rab proteins. *Methods*  
734 *Enzymol.* 2005;403:194-202. Epub 2006/02/14. doi: S0076-6879(05)03016-8 [pii]  
735 10.1016/S0076-6879(05)03016-8. PubMed PMID: 16473587.
- 736 45. Progida C, Malerod L, Stuffers S, Brech A, Bucci C, Stenmark H. RILP is required  
737 for the proper morphology and function of late endosomes. *J Cell Sci.* 2007;120(Pt  
738 21):3729-37. doi: 10.1242/jcs.017301. PubMed PMID: 17959629.
- 739 46. De Luca M, Cogli L, Progida C, Nisi V, Pascolutti R, Sigismund S, et al. RILP  
740 regulates vacuolar ATPase through interaction with the V1G1 subunit. *J Cell Sci.*  
741 2014;127(Pt 12):2697-708. doi: 10.1242/jcs.142604. PubMed PMID: 24762812.
- 742 47. Choi E, Zhang X, Xing C, Yu H. Mitotic Checkpoint Regulators Control Insulin  
743 Signaling and Metabolic Homeostasis. *Cell.* 2016. Epub 2016/07/05. doi: S0092-  
744 8674(16)30721-8 [pii]  
745 10.1016/j.cell.2016.05.074. PubMed PMID: 27374329.
- 746 48. Balbis A, Baquiran G, Dumas V, Posner BI. Effect of inhibiting vacuolar  
747 acidification on insulin signaling in hepatocytes. *J Biol Chem.* 2004;279(13):12777-85.  
748 Epub 2003/12/23. doi: 10.1074/jbc.M311493200  
749 M311493200 [pii]. PubMed PMID: 14688247.
- 750 49. Voight BF, Scott LJ, Steinthorsdottir V, Morris AP, Dina C, Welch RP, et al.  
751 Twelve type 2 diabetes susceptibility loci identified through large-scale association  
752 analysis. *Nat Genet.* 2010;42(7):579-89. Epub 2010/06/29. doi: ng.609 [pii]  
753 10.1038/ng.609. PubMed PMID: 20581827; PubMed Central PMCID: PMC3080658.
- 754 50. Morris AP, Voight BF, Teslovich TM, Ferreira T, Segre AV, Steinthorsdottir V, et  
755 al. Large-scale association analysis provides insights into the genetic architecture and  
756 pathophysiology of type 2 diabetes. *Nat Genet.* 2012;44(9):981-90. Epub 2012/08/14. doi:  
757 ng.2383 [pii]  
758 10.1038/ng.2383. PubMed PMID: 22885922; PubMed Central PMCID: PMC3442244.
- 759 51. Sherr CJ, Roberts JM. Living with or without cyclins and cyclin-dependent kinases.  
760 *Genes Dev.* 2004;18(22):2699-711. PubMed PMID: 15545627.

- 761 52. Barriere C, Santamaria D, Cerqueira A, Galan J, Martin A, Ortega S, et al. Mice  
762 thrive without Cdk4 and Cdk2. *Mol Oncol*. 2007;1(1):72-83. Epub 2007/06/01. doi:  
763 S1574-7891(07)00011-7 [pii]  
764 10.1016/j.molonc.2007.03.001. PubMed PMID: 19383288.
- 765 53. Kim SY, Lee JH, Merrins MJ, Gavrilova O, Bisteau X, Kaldis P, et al. Loss of  
766 Cyclin Dependent Kinase 2 in the Pancreas Links Primary beta-cell Dysfunction to  
767 Progressive Depletion of beta-cell Mass and Diabetes. *J Biol Chem*. 2017. doi:  
768 10.1074/jbc.M116.754077. PubMed PMID: 28100774.
- 769 54. Rothman JE. The future of Golgi research. *Mol Biol Cell*. 2010;21(22):3776-80.  
770 Epub 2010/11/17. doi: 21/22/3776 [pii]  
771 10.1091/mbc.E10-05-0418. PubMed PMID: 21079007; PubMed Central PMCID:  
772 PMC2982129.
- 773 55. De Matteis MA, Luini A. Exiting the Golgi complex. *Nat Rev Mol Cell Biol*.  
774 2008;9(4):273-84. Epub 2008/03/21. doi: nrm2378 [pii]  
775 10.1038/nrm2378. PubMed PMID: 18354421.
- 776 56. Gaulin JF, Fiset A, Fortier S, Faure RL. Characterization of Cdk2-cyclin E  
777 complexes in plasma membrane and endosomes of liver parenchyma. Insulin-dependent  
778 regulation. *J Biol Chem*. 2000;275(22):16658-65. Epub 2000/05/29. doi: 275/22/16658  
779 [pii]. PubMed PMID: 10828061.
- 780 57. Haj FG, Verveer PJ, Squire A, Neel BG, Bastiaens PI. Imaging sites of receptor  
781 dephosphorylation by PTP1B on the surface of the endoplasmic reticulum. *Science*.  
782 2002;295(5560):1708-11. Epub 2002/03/02. doi: 10.1126/science.1067566  
783 295/5560/1708 [pii]. PubMed PMID: 11872838.
- 784 58. Grecco HE, Schmick M, Bastiaens PI. Signaling from the living plasma membrane.  
785 *Cell*. 2011;144(6):897-909. doi: 10.1016/j.cell.2011.01.029. PubMed PMID: 21414482.
- 786 59. Baumdick M, Bruggemann Y, Schmick M, Xouri G, Sabet O, Davis L, et al. EGF-  
787 dependent re-routing of vesicular recycling switches spontaneous phosphorylation  
788 suppression to EGFR signaling. *Elife*. 2015;4. Epub 2015/11/27. doi: 10.7554/eLife.12223.  
789 PubMed PMID: 26609808; PubMed Central PMCID: PMC4716840.
- 790 60. Levy ED, Landry CR, Michnick SW. Cell signaling. Signaling through  
791 cooperation. *Science*. 2010;328(5981):983-4. Epub 2010/05/22. doi: 328/5981/983 [pii]  
792 10.1126/science.1190993. PubMed PMID: 20489011.
- 793 61. Wang W, Fridman A, Blackledge W, Connelly S, Wilson IA, Pilz RB, et al. The  
794 phosphatidylinositol 3-kinase/akt cassette regulates purine nucleotide synthesis. *J Biol*  
795 *Chem*. 2009;284(6):3521-8. Epub 2008/12/11. doi: M806707200 [pii]  
796 10.1074/jbc.M806707200. PubMed PMID: 19068483; PubMed Central PMCID:  
797 PMC2635033.
- 798 62. Asby DJ, Cuda F, Beyaert M, Houghton FD, Cagampang FR, Tavassoli A. AMPK  
799 Activation via Modulation of De Novo Purine Biosynthesis with an Inhibitor of ATIC  
800 Homodimerization. *Chem Biol*. 2015;22(7):838-48. Epub 2015/07/07. doi: S1074-  
801 5521(15)00234-3 [pii]  
802 10.1016/j.chembiol.2015.06.008. PubMed PMID: 26144885.
- 803 63. Zhang CS, Jiang B, Li M, Zhu M, Peng Y, Zhang YL, et al. The lysosomal v-  
804 ATPase-Ragulator complex is a common activator for AMPK and mTORC1, acting as a  
805 switch between catabolism and anabolism. *Cell Metab*. 2014;20(3):526-40. Epub  
806 2014/07/09. doi: S1550-4131(14)00279-4 [pii]

- 807 10.1016/j.cmet.2014.06.014. PubMed PMID: 25002183.  
808 64. Walter P, Ron D. The unfolded protein response: from stress pathway to  
809 homeostatic regulation. *Science*. 2011;334(6059):1081-6. Epub 2011/11/26. doi:  
810 334/6059/1081 [pii]  
811 10.1126/science.1209038. PubMed PMID: 22116877.  
812 65. Shanik MH, Xu Y, Skrha J, Dankner R, Zick Y, Roth J. Insulin resistance and  
813 hyperinsulinemia: is hyperinsulinemia the cart or the horse? *Diabetes Care*. 2008;31 Suppl  
814 2:S262-8. Epub 2008/02/15. doi: 31/Supplement\_2/S262 [pii]  
815 10.2337/dc08-s264. PubMed PMID: 18227495.  
816 66. Ader M, Stefanovski D, Kim SP, Richey JM, Ionut V, Catalano KJ, et al. Hepatic  
817 insulin clearance is the primary determinant of insulin sensitivity in the normal dog.  
818 *Obesity (Silver Spring)*. 2014;22(5):1238-45. Epub 2013/10/15. doi: 10.1002/oby.20625.  
819 PubMed PMID: 24123967; PubMed Central PMCID: PMC3969862.  
820 67. Bergeron JJ, Au CE, Desjardins M, McPherson PS, Nilsson T. Cell biology through  
821 proteomics--ad astra per alia porci. *Trends Cell Biol*. 2010;20(6):337-45. Epub 2010/03/17.  
822 doi: S0962-8924(10)00038-3 [pii]  
823 10.1016/j.tcb.2010.02.005. PubMed PMID: 20227883.  
824 68. Ferrannini E. The target of metformin in type 2 diabetes. *N Engl J Med*.  
825 2014;371(16):1547-8. Epub 2014/10/16. doi: 10.1056/NEJMcibr1409796. PubMed  
826 PMID: 25317875.  
827 69. Havlis J, Thomas H, Sebela M, Shevchenko A. Fast-response proteomics by  
828 accelerated in-gel digestion of proteins. *Anal Chem*. 2003;75(6):1300-6. PubMed PMID:  
829 12659189.  
830 70. Shevchenko A, Wilm M, Vorm O, Mann M. Mass spectrometric sequencing of  
831 proteins silver-stained polyacrylamide gels. *Anal Chem*. 1996;68(5):850-8. PubMed  
832 PMID: 8779443.  
833 71. Au CE, Bell AW, Gilchrist A, Hiding J, Nilsson T, Bergeron JJ. Organellar  
834 proteomics to create the cell map. *Curr Opin Cell Biol*. 2007;19(4):376-85. Epub  
835 2007/08/11. doi: S0955-0674(07)00096-8 [pii]  
836 10.1016/j.ceb.2007.05.004. PubMed PMID: 17689063.  
837 72. Yu H, Braun P, Yildirim MA, Lemmens I, Venkatesan K, Sahalie J, et al. High-  
838 quality binary protein interaction map of the yeast interactome network. *Science*.  
839 2008;322(5898):104-10. Epub 2008/08/23. doi: 1158684 [pii]  
840 10.1126/science.1158684. PubMed PMID: 18719252; PubMed Central PMCID:  
841 PMC2746753.  
842 73. Mellacheruvu D, Wright Z, Couzens AL, Lambert JP, St-Denis NA, Li T, et al. The  
843 CRAPome: a contaminant repository for affinity purification-mass spectrometry data. *Nat*  
844 *Methods*. 2013;10(8):730-6. doi: 10.1038/nmeth.2557. PubMed PMID: 23921808;  
845 PubMed Central PMCID: PMCPMC3773500.  
846 74. Morone F, Makse HA. Influence maximization in complex networks through  
847 optimal percolation. *Nature*. 2015;524(7563):65-8. Epub 2015/07/02. doi: nature14604  
848 [pii]  
849 10.1038/nature14604. PubMed PMID: 26131931.  
850 75. Xue Y, Ren J, Gao X, Jin C, Wen L, Yao X. GPS 2.0, a tool to predict kinase-  
851 specific phosphorylation sites in hierarchy. *Mol Cell Proteomics*. 2008;7(9):1598-608. doi:

852 10.1074/mcp.M700574-MCP200. PubMed PMID: 18463090; PubMed Central PMCID:  
853 PMCPMC2528073.

854 76. Hornbeck PV, Zhang B, Murray B, Kornhauser JM, Latham V, Skrzypek E.  
855 PhosphoSitePlus, 2014: mutations, PTMs and recalibrations. *Nucleic Acids Res.*  
856 2015;43(Database issue):D512-20. doi: 10.1093/nar/gku1267. PubMed PMID: 25514926;  
857 PubMed Central PMCID: PMCPMC4383998.

858 77. Linding R, Jensen LJ, Pasculescu A, Olhovsky M, Colwill K, Bork P, et al.  
859 NetworKIN: a resource for exploring cellular phosphorylation networks. *Nucleic Acids*  
860 *Res.* 2008;36(Database issue):D695-9. doi: 10.1093/nar/gkm902. PubMed PMID:  
861 17981841; PubMed Central PMCID: PMCPMC2238868.

862 78. Boyle AP, Hong EL, Hariharan M, Cheng Y, Schaub MA, Kasowski M, et al.  
863 Annotation of functional variation in personal genomes using RegulomeDB. *Genome Res.*  
864 2012;22(9):1790-7. doi: 10.1101/gr.137323.112. PubMed PMID: 22955989; PubMed  
865 Central PMCID: PMCPMC3431494.

866 79. van Dam S, Craig T, de Magalhaes JP. GeneFriends: a human RNA-seq-based gene  
867 and transcript co-expression database. *Nucleic Acids Res.* 2015;43(Database  
868 issue):D1124-32. doi: 10.1093/nar/gku1042. PubMed PMID: 25361971; PubMed Central  
869 PMCID: PMCPMC4383890.

870 80. Mootha VK, Lindgren CM, Eriksson KF, Subramanian A, Sihag S, Lehar J, et al.  
871 PGC-1alpha-responsive genes involved in oxidative phosphorylation are coordinately  
872 downregulated in human diabetes. *Nat Genet.* 2003;34(3):267-73. doi: 10.1038/ng1180.  
873 PubMed PMID: 12808457.

874 81. Subramanian A, Tamayo P, Mootha VK, Mukherjee S, Ebert BL, Gillette MA, et al.  
875 Gene set enrichment analysis: a knowledge-based approach for interpreting genome-  
876 wide expression profiles. *Proc Natl Acad Sci U S A.* 2005;102(43):15545-50. doi:  
877 10.1073/pnas.0506580102. PubMed PMID: 16199517; PubMed Central PMCID:  
878 PMCPMC1239896.

879

## 880 **Figures Legends**

881 **Figure 1. Network of enriched cellular processes in IR-containing endosomes.** (A)  
882 Workflow of network construction: Inbound endosomal proteins (IREP) were classified  
883 into major functional groups according to the MGI database and using the tool BINGO.  
884 The triangles (2 minutes) and the squares (15 minutes) are indicative of the insulin post-  
885 injection time before endosomal preparation. The circles indicate proteins identified at both  
886 times. The hexagonal nodes and their respective border paints represent the functional  
887 groups associated linked proteins. Proteins associated with more than one functional group  
888 have the border paints of the most statistically significant functional group (Table S1).  
889 (B) (left panel), Comparative enrichment profiles of trafficking proteins according to the  
890 insulin post-injection time. (right panel), The bound fraction (100  $\mu$ g of protein) was blotted  
891 and pieces were incubated with antibodies against IR (95 kDa  $\alpha$ -subunit), phosphotyrosine  
892 (PY-20, PY-95 kDa) and PTPLAD1.

893

894 **Figure 2. Diabetes-associated genes form a protomodule.** (A) Overall, 452 diabetes-  
895 associated gene (DAGs; GWAS p value  $< 5 \times 10^{-8}$  and OMIM; Table S3) products form a  
896 PPIN of 184 proteins and 309 interactions (Tables S4, S5) termed T2D-protomodule. (B) In  
897 total, 10 % (11/102) of the high-confidence DAGs with a probability less than  $5 \times 10^{-8}$ , 53

898 % of the DAGs with a probability less than  $1 \times 10^{-8}$  (141/266) and 49 % of the OMIM genes  
899 (49/84) are recovered in the proto-T2D module, showing a tendency to select the highest  
900 level of reliability. (C) Nodes – degree distribution: More than 38% of nodes (70 nodes) in  
901 the proto-T2D module are peripheral with a minority of hubs from transcription factor  
902 families. The general topology of the protomodule is characteristic of a disease network with  
903 the presence of few central hubs of large size, surrounded by numerous peripheral hubs of  
904 smaller size (Table S5).

905

906 **Figure 3. The physical protein interaction network of IR-containing endosomes**  
907 **(IREN) has a Cdk2 centrality and is highly associated with type 2 diabetes risk.** The  
908 557 IREP proteins (Table S4-sheet IREP-HUGO) were grouped and linked according to  
909 their physical association. The resulting network is formed by 313 nodes and 1147 edges  
910 (56% of IREP proteins). The general topology of IREN is based on few major hubs, with  
911 the kinase Cdk2 displaying the highest centrality (Table S5). Candidates (yellow and blue  
912 colors and black characters; Tables 1 and 2) and DAGs (pink color and black characters)  
913 form a single-connected disease module of 94 nodes (33% of IREN nodes) with 330  
914 interactions (28,7% of IREN interactions). An expansion to the first level of adjacent nodes  
915 results in a connected subnetwork of 272 nodes (88% of nodes) covering 92% of interactions  
916 (1070 out of 1147 IREN interactions; Figures 3 and S3). The functional groups are  
917 represented according to the colors of the borders indicated in the legends.

918

919 **Figure 4. Cdk2 and PTPLAD1 interact with IR complex organization.** (A) HEK293  
920 cells were transfected with pcDNA3-CDK2 (T) or pcDNA3 (NT) for 48 hours. They were  
921 preincubated in serum-free medium for 5 hours and then stimulated for the indicated times  
922 with insulin (35 nM). Left panel: IR immunoprecipitation (IP: IR $\alpha$ ), IR  
923 autophosphorylation (PY 95 kDa) and CDK2, TUBA and TUBB presence. Right panel:  
924 Immunoblots (WB) of CDK2, IR- $\alpha$ -subunit, TUBA, B (pieces of the same membrane  
925 except PY-95 kDa (PY20 antibody); 3 independent experiments). (B) IR  
926 autophosphorylation increases in isolated endosomes depleted of PTPLAD1. Right panel:  
927 Rats were injected with a scrambled (SCR) or siRNA oligonucleotide targeting PTPLAD1  
928 for 48 hours. The G/E fractions were then prepared from livers at their IR concentration  
929 time-peak (2 minutes after insulin injection; 1.5  $\downarrow$  g/100 g, b.w.). The presence of IR and  
930 PTPLAD1 was verified by immunoblot (IB: G/E, input 50  $\downarrow$  g of protein, pieces of the  
931 same membrane). IR immunoprecipitation (IP: IR $\alpha$ ) and IR autophosphorylation (PY 95  
932 kDa) were measured after suspending endosomes in a cell-free system in the presence of  
933 ATP for 2 minutes at 37 °C. After stopping the reaction, autophosphorylation was detected  
934 by immunoblotting using an anti-phosphotyrosine antibody (PY20). Normalized values  
935 shown in the right panel are means  $\pm$  s.d. (\* P<0.001 n=3). Left panel: PTPLAD1 was  
936 immunoprecipitated from the same fractions (input 30 mg protein of solubilized G/E) and  
937 incubated with p-NPP in the presence or absence of 50  $\downarrow$  M bpV(phen). The measured  
938 activity was expressed as a percentage of 0.55  $\pm$  0.8 mmoles/min/mg of cell extract, n=4.  
939 (C) Cells were transfected with PTPLAD1-pcDNA3 (T) or pcDNA3 (NT) for 48 hours,  
940 incubated in serum-free medium for 5 hours and then stimulated for the indicated times  
941 with insulin (35 nM). The panel on the right shows immunoblots of PTPLAD1, IR- $\alpha$ -  
942 subunit, Rab5a and Rab11c from the total cell lysates. Left panel, IPs of IR $\alpha$ ,  
943 phosphotyrosine (PY20 antibody, middle left), and Cdk2 (bottom left) (3 independent

944 experiments). (D) PTPLAD1 siRNA knockdown. IPs of the IR  $\alpha$  subunits were resolved  
945 by SDS-PAGE and were blotted for the indicated proteins (3 independent experiments).  
946 (E) The plasmamembrane (PM) fractions were prepared from rat liver at the indicated time  
947 following the injection of insulin (1.5  $\mu$ g/100 g b.w.). Fractions were monitored for the  
948 PM-associated MAD2 by immunoblotting (50  $\mu$ g of protein).

949

950 **Figure 5. The pharmacological inhibition of the V-ATPase hub activity delays the**  
951 **time peak of IR accumulation in endosomes.** Rats that were treated with concanamycin  
952 A (Conca A, 4.0  $\mu$ g/100 g, b.w.) or were left untreated, were then stimulated with insulin  
953 (1.5  $\mu$ g/100 g, b.w.) for the indicated time and the G/E fractions were isolated. (A) Left  
954 panel, immunoblot of IR using the anti-IR $\beta$  subunit or  $\alpha$ PY20 (95 kDa PY) antibodies (50  
955  $\mu$ g of protein). Right panel, rats were left untreated or treated with bafilomycin A1 (Baf  
956 A1, 0.5  $\mu$ g/100 g, b.w.). IRs from G/E fractions prepared at the noted time following insulin  
957 administration (1.5  $\mu$ g/100 g, body weight) were partially purified by WGA-sepharose  
958 affinity chromatography and subjected to exogenous kinase assay.  $^{32}$ P incorporation into  
959 poly Glu-Tyr (4 :1) is expressed as pmol/ $\mu$ g protein. Values shown are means  $\pm$  s.d.  
960 (P<0.0001, 2 minutes and 15 minutes, n=3). (B) G/E liver fractions were prepared at their  
961 IR concentration time peak (2 minutes after insulin injection; 1.5  $\mu$ g/100 g b.w.) and  
962 immediately suspended in the cell-free system for 0 and 2 minutes at 37 °C and in the  
963 presence of ATP and the absence or presence of fresh cytosol (diluted 1/10) and Conca A.  
964 After stopping the reaction (0 and 2 minutes), the fractions were immunoblotted (input 50  
965  $\mu$ g of protein; 12 % resolving gels) with the anti-phosphotyrosine ( $\psi$ p-Tyr, left panel) or  
966 anti-phosphothreonine ( $\psi$ p-Thr, right panel) antibodies. (C) Subnetwork extracted from  
967 IREN (Figure 3) depicting the connectivity of V-ATPase subunits. The V-ATPase subunits  
968 ATP6V1A, ATP6V1E1, ATP6VDA1 and ATP6V1B2 containing high confidence IR-  
969 tyrosine kinase phosphorylation and Ser/Thr kinases Cdk2, PRKAA1 (AMPK) and Citron  
970 phosphorylation motifs (Table S10) are marked according to the legend.

971

## 972 **Tables**

973 **Table-1 List of candidates** Thirty-eight IREP coding genes are validated for association  
974 with diabetes traits by at least three out of four distinct approaches. (PPIN) protein-protein  
975 interactions network. (GO) Gene Ontology, Subcellular co-localization. (GWAS) fine-  
976 mapping. (COEXPRESSION) same expression pattern.

977

| CANDIDATES/<br>SUBSTRATES | CANDIDATES NAMES                                                           | UPSTREAM KINASES IN IREP                       | VALIDATION                |
|---------------------------|----------------------------------------------------------------------------|------------------------------------------------|---------------------------|
| CDK2                      | Cyclin-Dependent Kinase 2                                                  | CDK2                                           | PPIN/GO/GWAS/COEXPRESSION |
| B2M                       | Beta-2-Microglobulin                                                       | -                                              | PPIN/GO/COEXPRESSION      |
| ATP2A2                    | Sarcoplasmic/Endoplasmic Reticulum Calcium Atpase 2                        | AMPKA1/CAMKK2/CDK2/ROCK1                       | PPIN/GO/COEXPRESSION      |
| CTNNB1                    | Catenin Beta-1                                                             | AMPKA2/CAMKK2/CDK2/CIT/INSR/ROCK1              | PPIN/GO/GWAS              |
| GNB4                      | Guanine Nucleotide-Binding Protein Subunit Beta-4                          | CAMKK2/ROCK1                                   | PPIN/GO/GWAS              |
| HSPA8                     | Heat Shock Protein Family A (Hsp70) Member 8                               | AMPKA1/CAMKK2/CDK2/CIT/INSR                    | PPIN/GO/GWAS              |
| RAB14                     | Ras-Related Protein Rab-14                                                 | AMPKA1                                         | PPIN/GO/GWAS              |
| SEC24A                    | Protein Transport Protein Sec24a                                           | AMPKA1/AMPKA2/CAMKK2/CDK2                      | PPIN/GO/GWAS              |
| SEC31A                    | Protein Transport Protein Sec31a                                           | AMPKA1/AMPKA2/CDK2/CIT/INSR                    | PPIN/GO/GWAS              |
| TFRC                      | Transferrin Receptor Protein 1                                             | CAMKK2/CDK2/CIT/INSR                           | PPIN/GO/GWAS              |
| ALB                       | Albumin                                                                    | -                                              | PPIN/GO/COEXPRESSION      |
| AP1B1                     | Ap-1 Complex Subunit Beta-1                                                | CAMKK2/CDK2/CIT                                | PPIN/GO/COEXPRESSION      |
| AP1G1                     | Ap-1 Complex Subunit Gamma-1                                               | AMPKA2/CAMKK2/CIT                              | PPIN/GO/COEXPRESSION      |
| AP1M1                     | Ap-1 Complex Subunit Mu-1                                                  | AMPKA1/CDK2/CIT/INSR/ROCK1                     | PPIN/GO/COEXPRESSION      |
| AP1S1                     | Ap-1 Complex Subunit Sigma-1a                                              | CDK2                                           | PPIN/GO/COEXPRESSION      |
| APOC2                     | Apolipoprotein C-II                                                        | -                                              | PPIN/GO/COEXPRESSION      |
| ATIC                      | Bifunctional Purine Biosynthesis Protein Purh                              | CAMKK2/INSR/ROCK1                              | PPIN/GO/COEXPRESSION      |
| AP2M1                     | Ap-2 Complex Subunit Mu                                                    | AMPKA1/CAMKK2/CDK2/CIT                         | PPIN/GO/COEXPRESSION      |
| CALR                      | Calreticulin                                                               | AMPKA2/CDK2/ERBB4                              | PPIN/GO/COEXPRESSION      |
| CAV1                      | Caveolin-1                                                                 | INSR                                           | PPIN/GO/COEXPRESSION      |
| CD74                      | Hla Class II Histocompatibility Antigen Gamma Chain                        | AMPKA1/CAMKK2/INSR/ROCK1                       | PPIN/GO/COEXPRESSION      |
| CLTC                      | Clathrin Heavy Chain 1                                                     | AMPKA2/CAMKK2/CDK2/CIT/INSR/ROCK1              | PPIN/GO/COEXPRESSION      |
| EEF1A1                    | Elongation Factor 1-Alpha 1                                                | CDK2                                           | PPIN/GO/COEXPRESSION      |
| FGA                       | Fibrinogen Alpha Chain                                                     | AMPKA2/CAMKK2/CDK2/CIT/INSR                    | PPIN/GO/COEXPRESSION      |
| GNAI2                     | Guanine Nucleotide-Binding Protein G                                       | CAMKK2/CIT/INSR                                | PPIN/GO/COEXPRESSION      |
| HPX                       | Hemopexin                                                                  | CDK2/CIT/ERBB4/INSR                            | PPIN/GO/COEXPRESSION      |
| JUP                       | Junction Plakoglobin                                                       | AMPKA2/CaMKK2/CDK2/ERBB4                       | PPIN/GO/COEXPRESSION      |
| LRP1                      | Low-Density Lipoprotein Receptor-Related Protein 1                         | AMPKA1/AMPKA2/CaMKK2/CDK2/CIT/ERBB4/InsR/ROCK1 | PPIN/GO/COEXPRESSION      |
| PTPRF                     | Receptor-Type Tyrosine-Protein Phosphatase F                               | AMPKA1/AMPKA2/CAMKK2/CDK2/ERBB4/INSR           | PPIN/GO/COEXPRESSION      |
| RAB5C                     | Ras-Related Protein Rab-5c                                                 | CAMKK2/CDK2/CIT/INSR                           | PPIN/GO/COEXPRESSION      |
| RAP1A                     | Ras-Related Protein Rap-1a                                                 | CDK2/ERBB4                                     | PPIN/GO/COEXPRESSION      |
| SDC1                      | Syndecan-1                                                                 | AMPKA1/CDK2/INSR                               | PPIN/GO/COEXPRESSION      |
| SEC23A                    | Protein Transport Protein Sec23a                                           | AMPKA1/CDK2/INSR                               | PPIN/GO/COEXPRESSION      |
| SEC24C                    | Protein Transport Protein Sec24c                                           | AMPKA2/CAMKK2/CDK2/CIT/INSR                    | PPIN/GO/COEXPRESSION      |
| ATP5B                     | Atp Synthase Subunit Beta, Mitochondrial                                   | AMPKA1/AMPKA2/CDK2/CIT                         | PPIN/GWAS/COEXPRESSION    |
| COPA                      | Coatomer Subunit Alpha                                                     | AMPKA1/AMPKA2/CDK2/ERBB4                       | PPIN/GWAS/COEXPRESSION    |
| GBF1                      | Golgi-Specific Brefeldin A-Resistance Guanine Nucleotide Exchange Factor 1 | AMPKA1/AMPKA2/CAMKK2/CDK2/ERBB4/ROCK1          | PPIN/GWAS/COEXPRESSION    |
| PTPN6 (SHP1)              | Tyrosine-Protein Phosphatase Non-Receptor Type 6                           | AMPKA2/CAMKK2/CDK2/INSR                        | PPIN/GWAS/COEXPRESSION    |

978  
979

## 980 Supplemental Informations

981

982 Figure S1 LD display (Haploview) of the *CDK2* and *HACD3* genes.

983 Figure S2 Random reiterations (10 000) simulations of 94 nodes subnetworks.



984 Figure S3 IREP: Number of newly identified proteins from one experiment to another  
985 (tryptic peptides).  
986 Figure S4 Hybrid module (T2D-protomodule/IREP).  
987 Figure S5 Extracted T2D subnetwork  
988 Table S1. Proteome: proteins and spectra reports.  
989 Table S2. Source list of T2D and associated traits (glucose intolerance, obesity) genes.  
990 Table S3. Selected DAGs and validated seeds.  
991 Table S4. Listing of IREP proteins orthology and networks.  
992 Table S5. IREN and T2D-protomodule construction with Hubaa; GO analysis.  
993 Table S6. Gene Ontology (GO) subcellular analysis.  
994 Table S7. Fine mapping analysis: LD analysis of IREP coding genes and DAGs variants.  
995 Table S8. TF motifs and coexpression analysis.  
996 Table S9. Tables of candidates: 63 IREP coding genes are validated for association to  
997 diabetes traits by at least two out of four distinct approaches. (PPIN) protein-protein  
998 interactions network. (GO) Gene Ontology, Sub-cellular colocalization. (GWAS) fine-  
999 mapping. (COEXPRESSION) same expression pattern.  
1000 Table S10. Kinase-substrate analysis based on Phosphositeplus, Networkin and GPS 3.0  
1001 databases.  
1002  
1003

**A)**

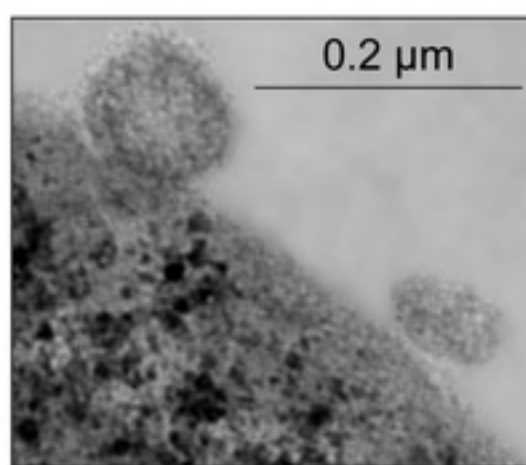

Endosomes  
immunocaptured  
on anti-IR

↓  
Trypsinization

↓  
LC-MS/MS

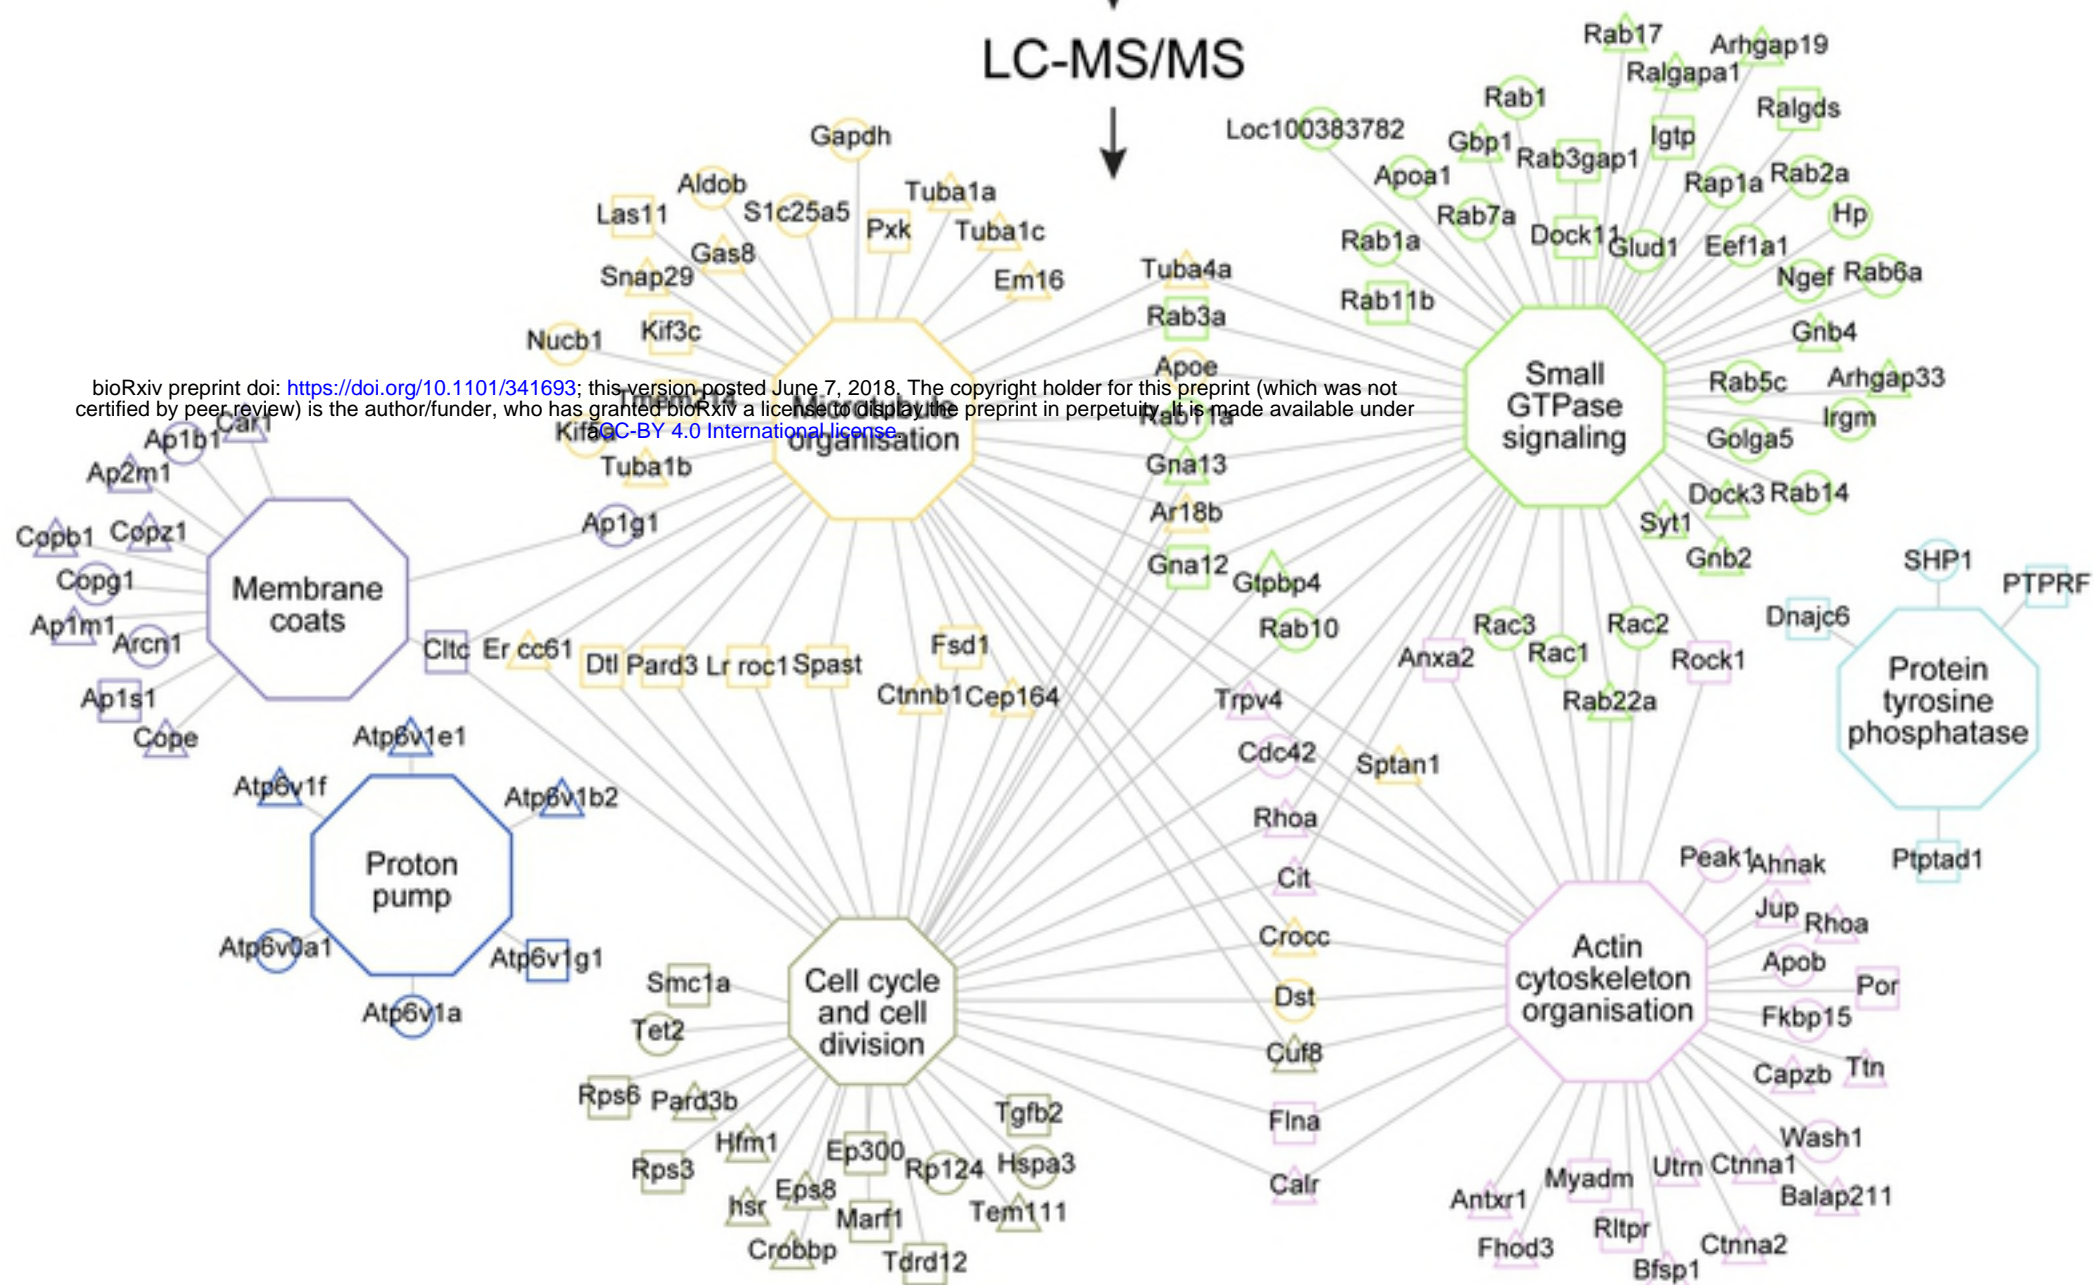

**B)**

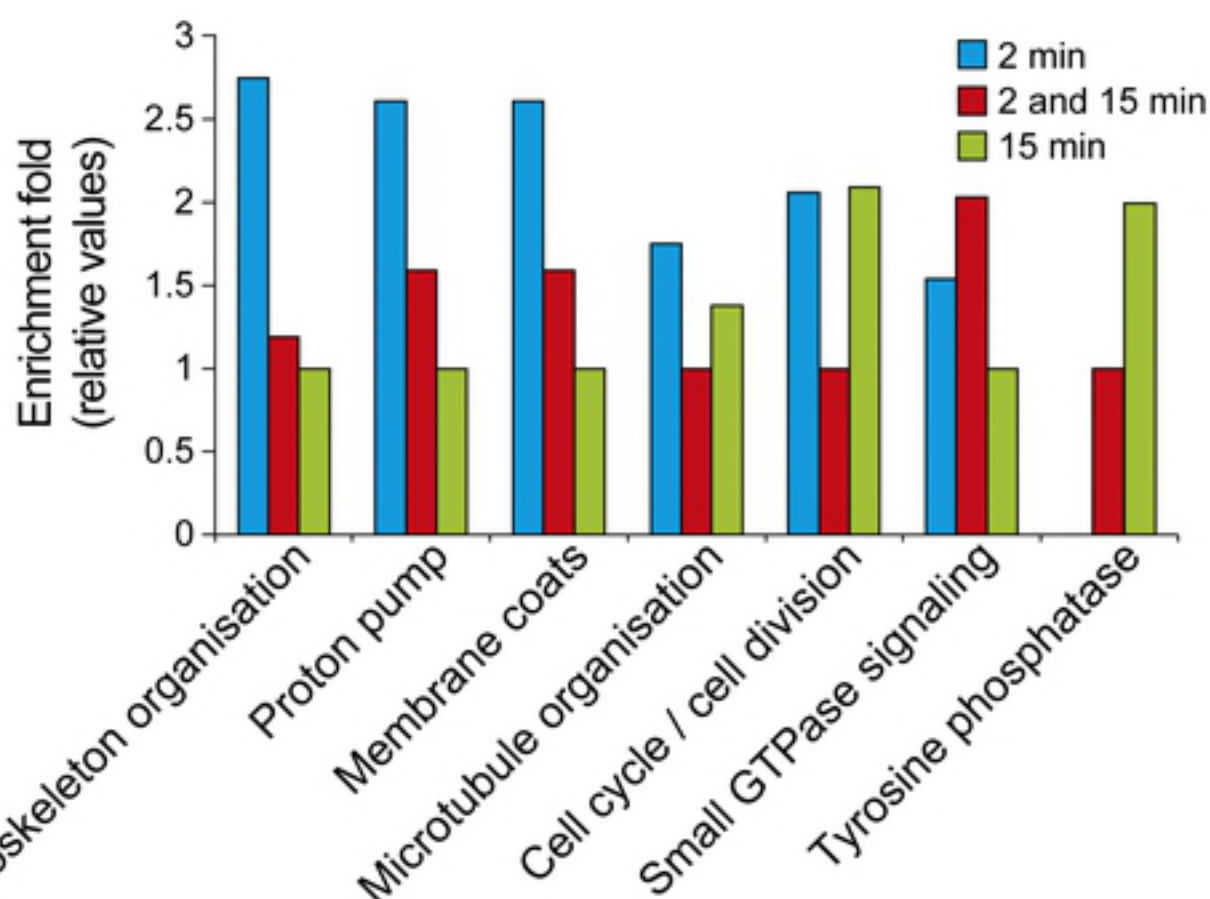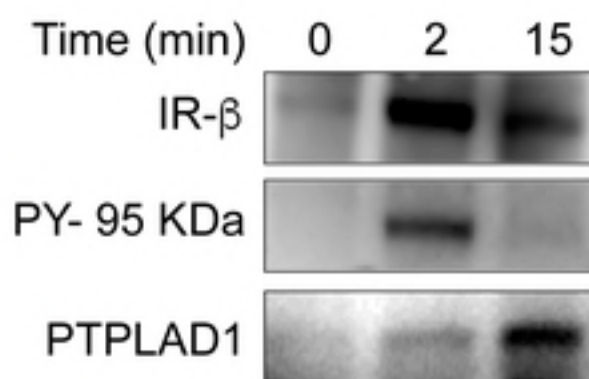

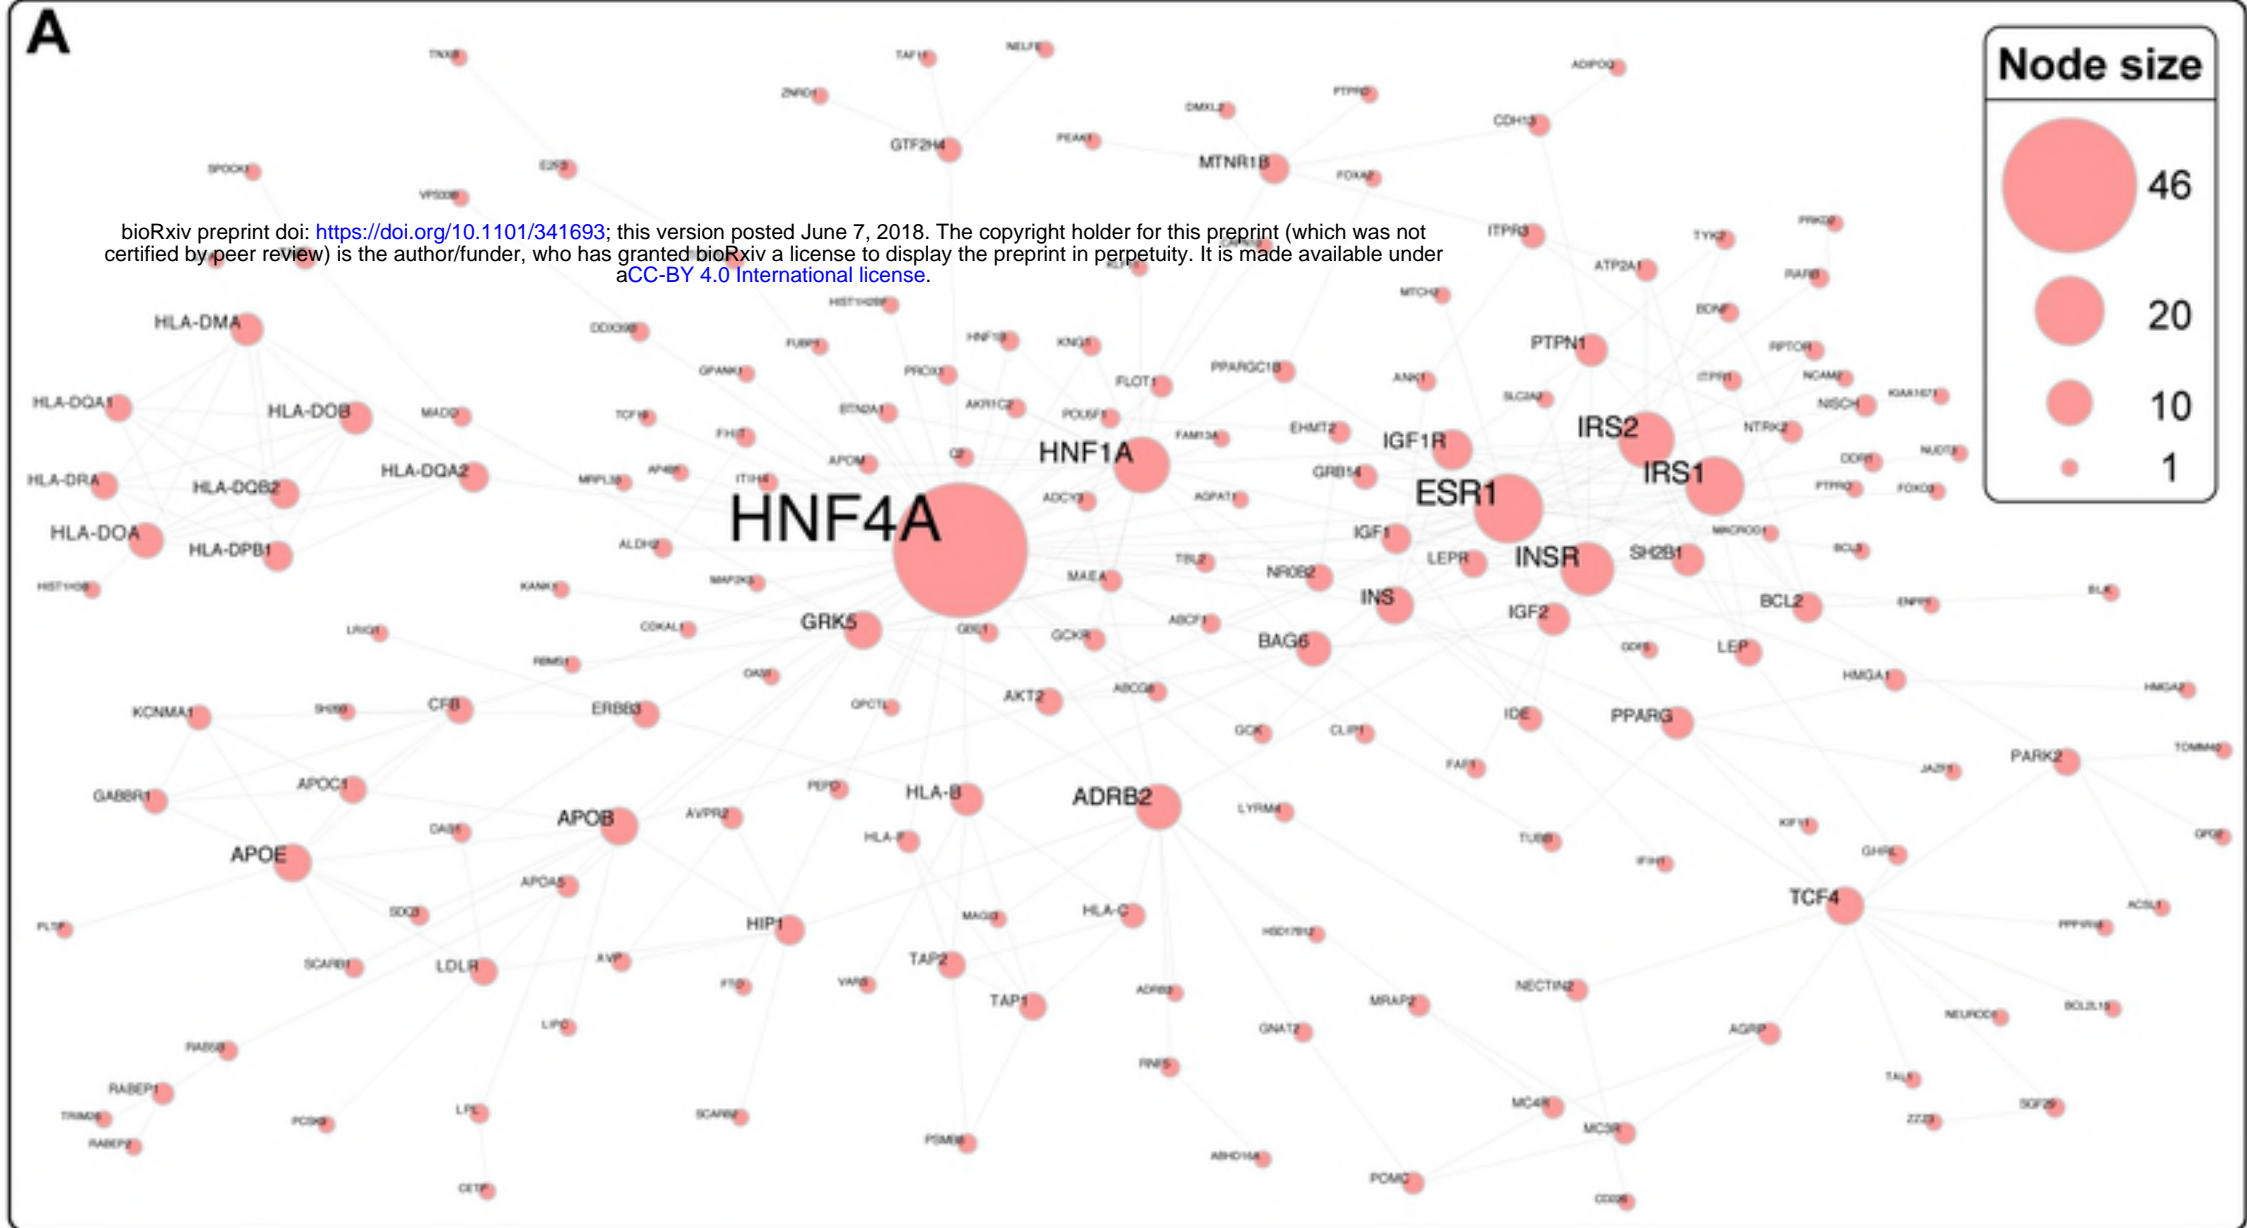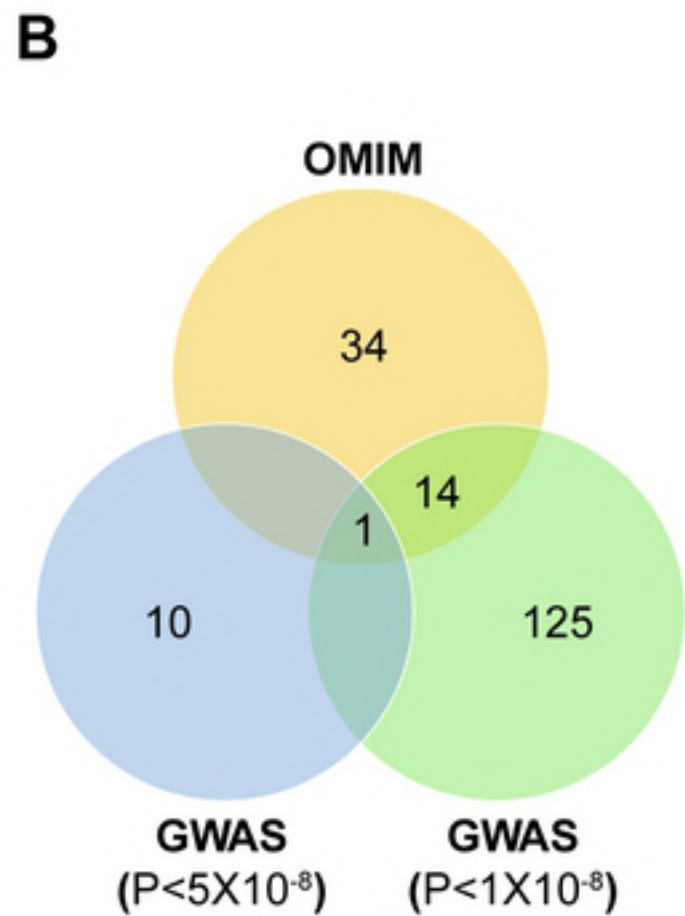

**C** Nodes – degree distribution:

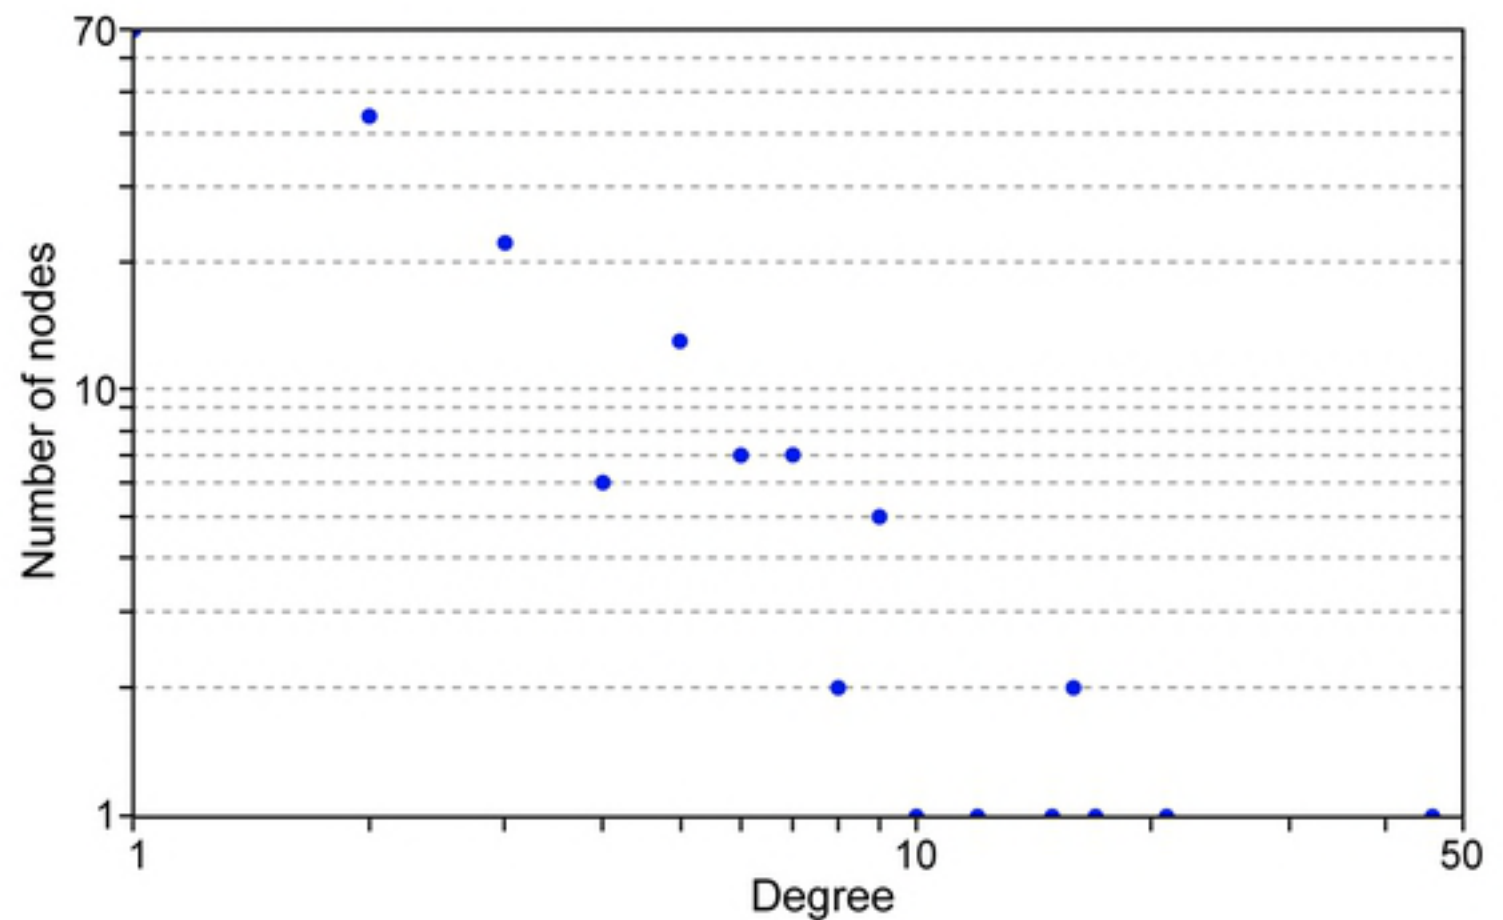

# IREN

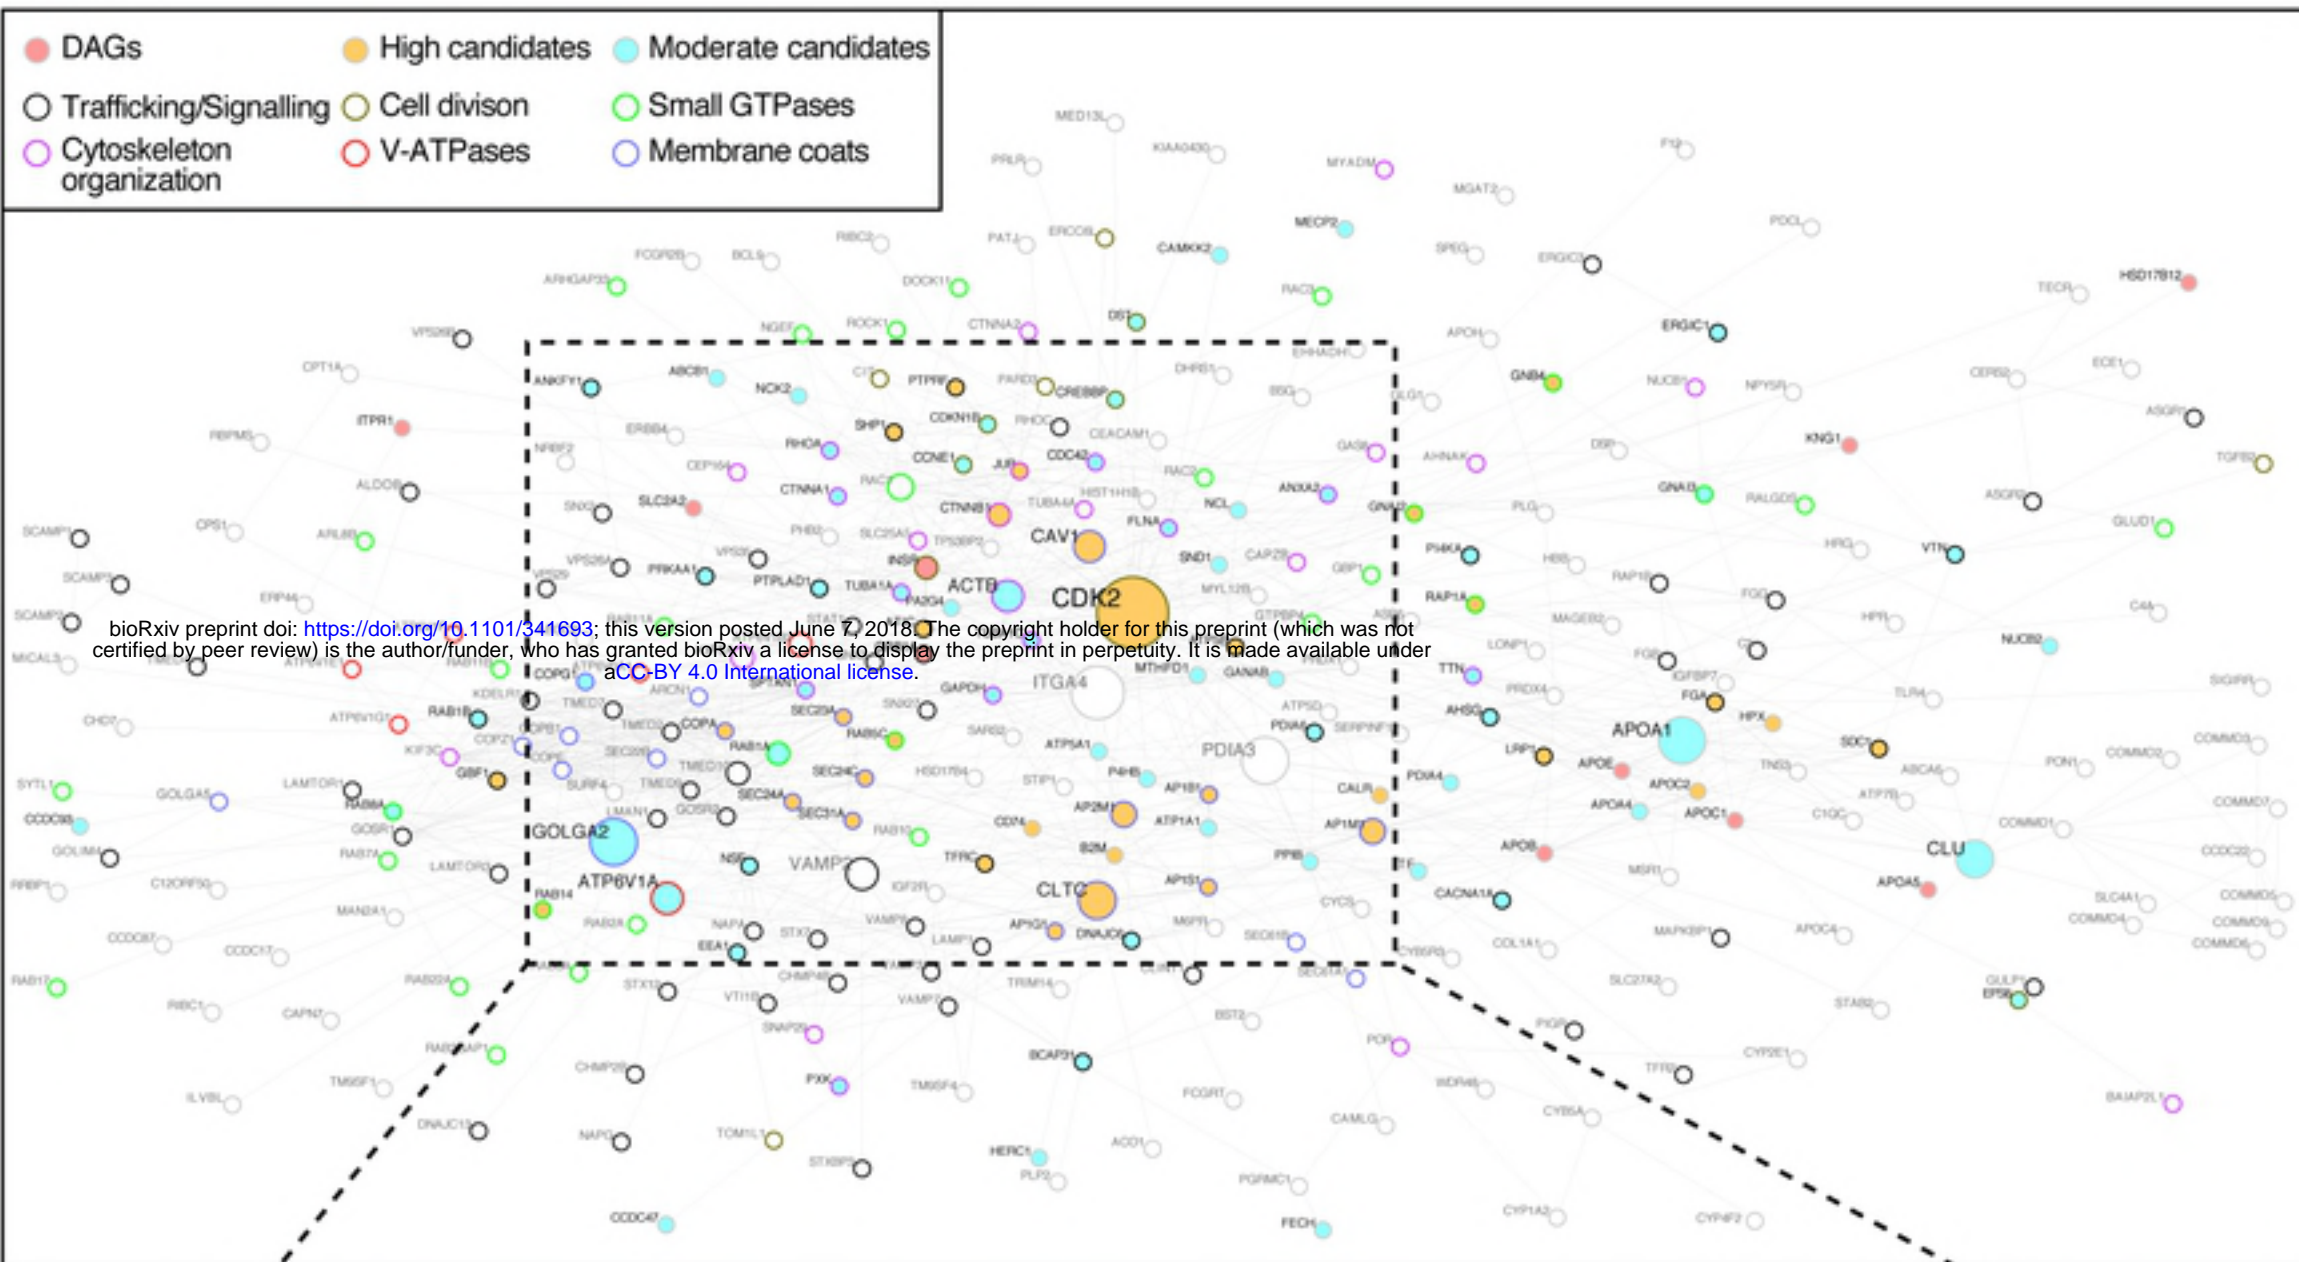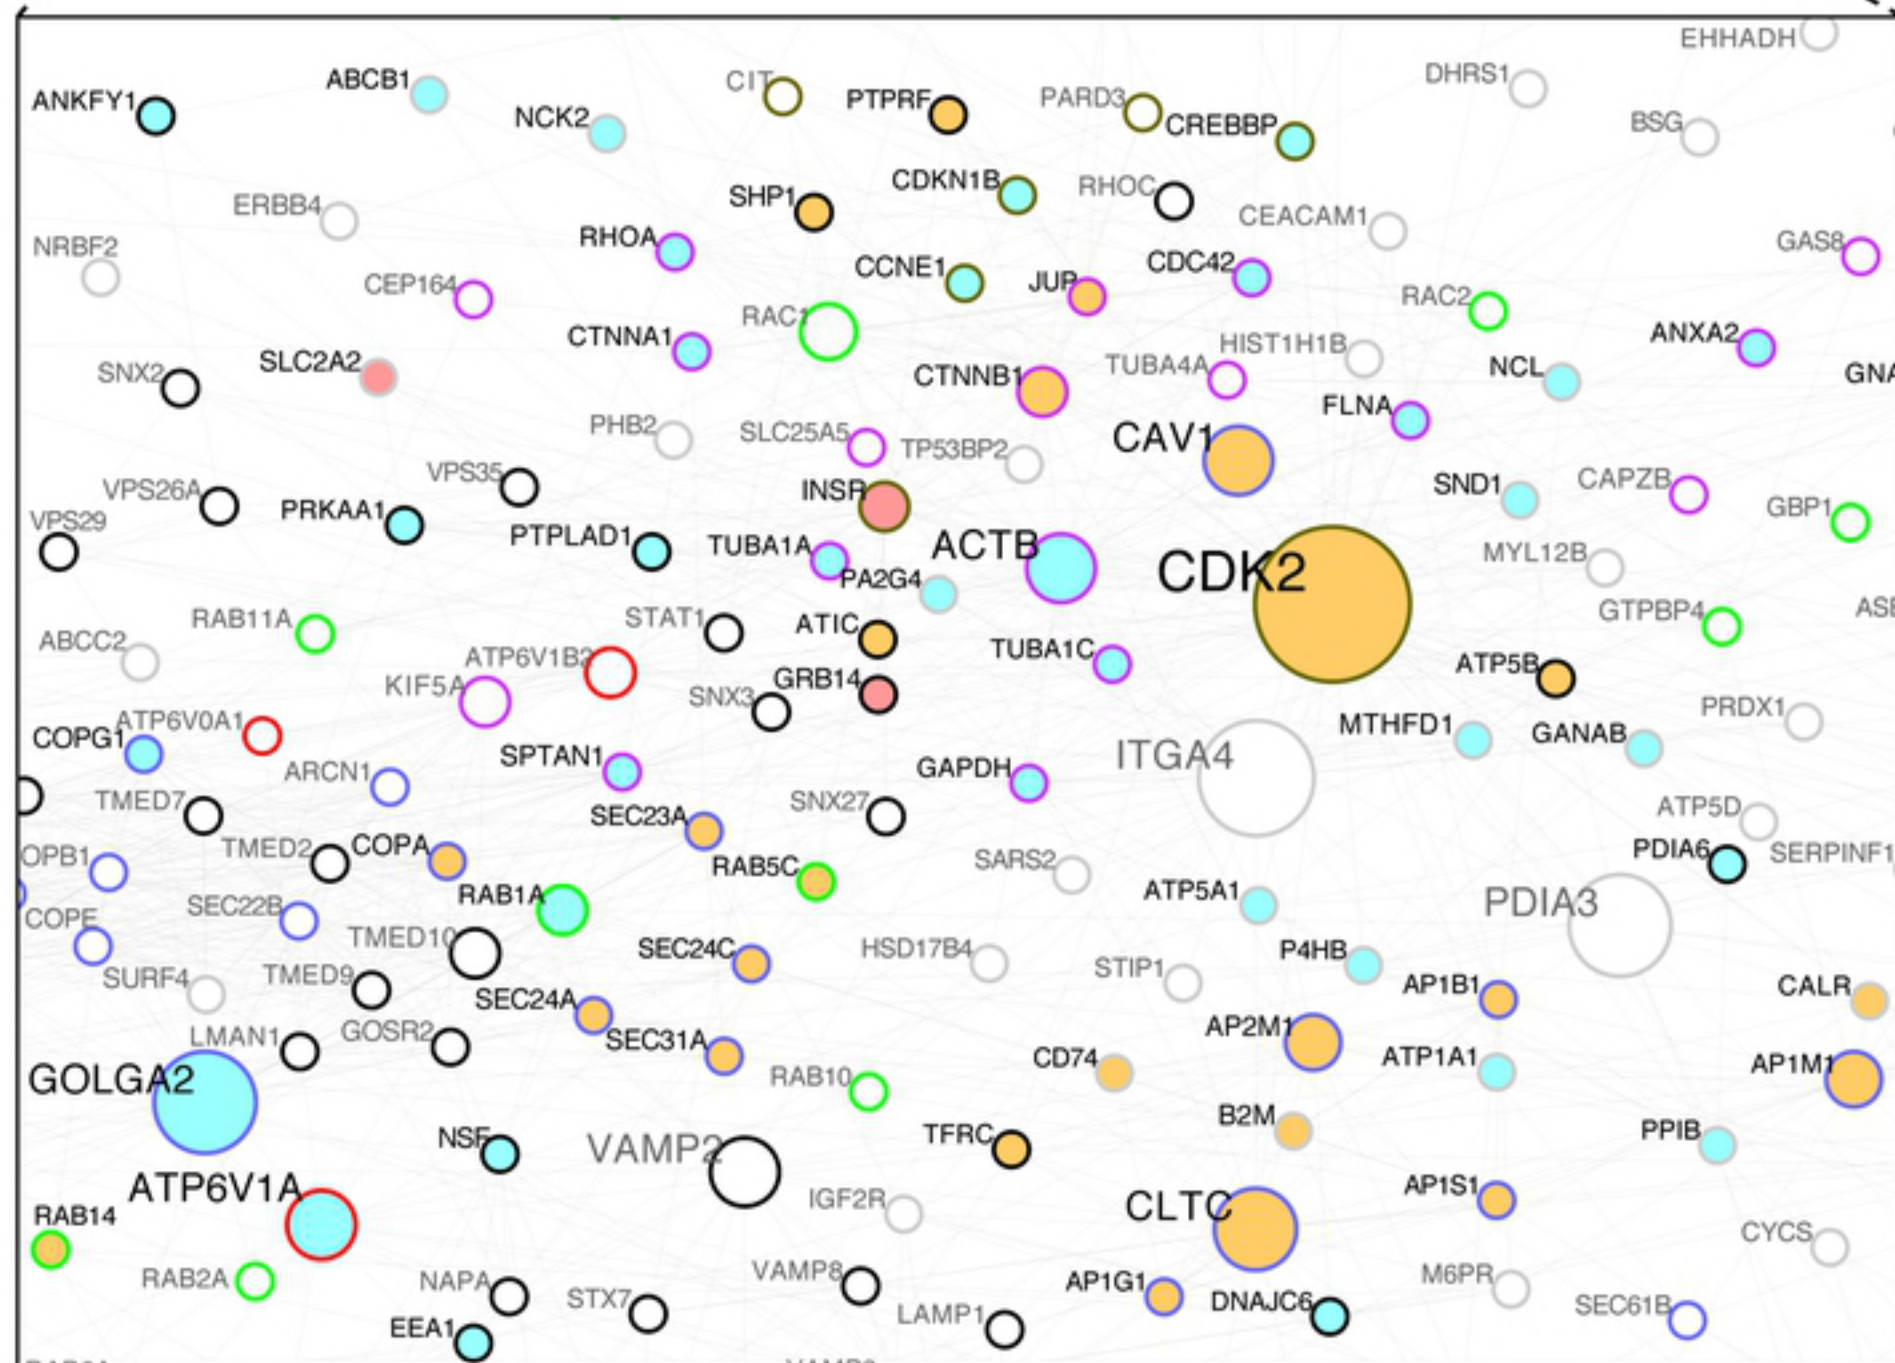

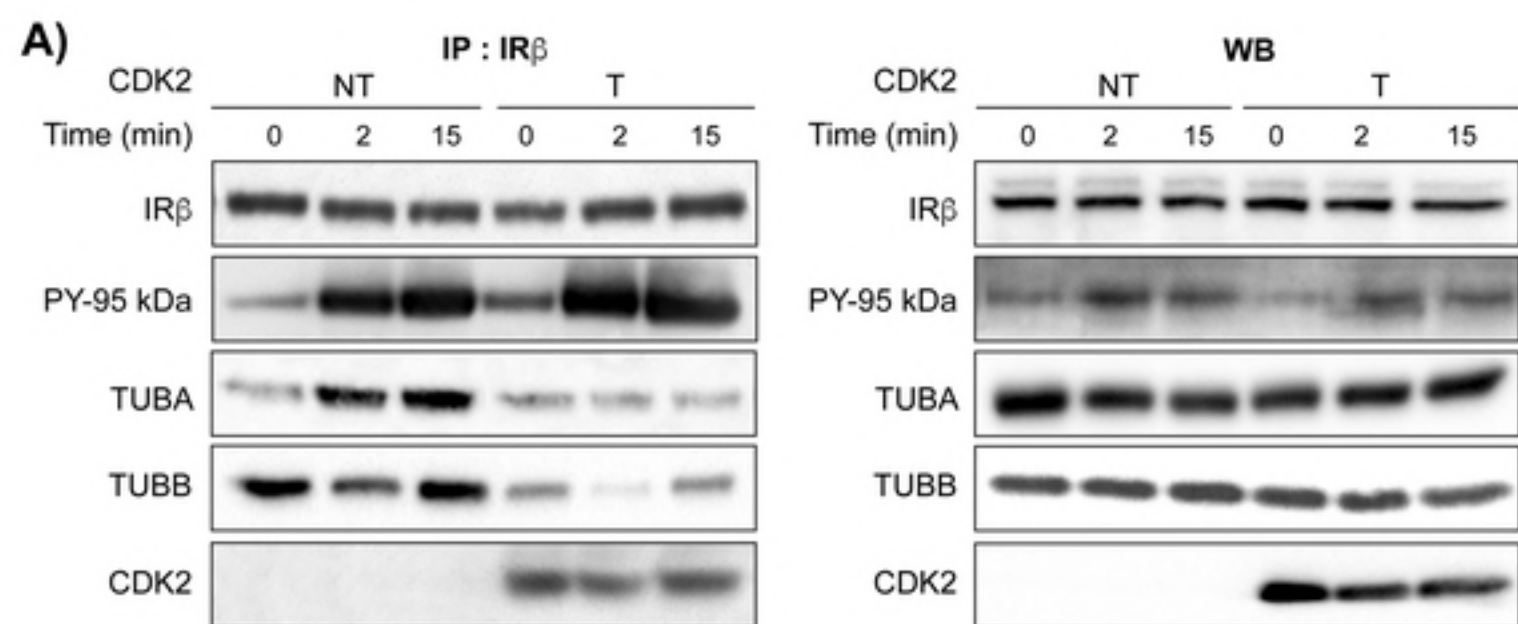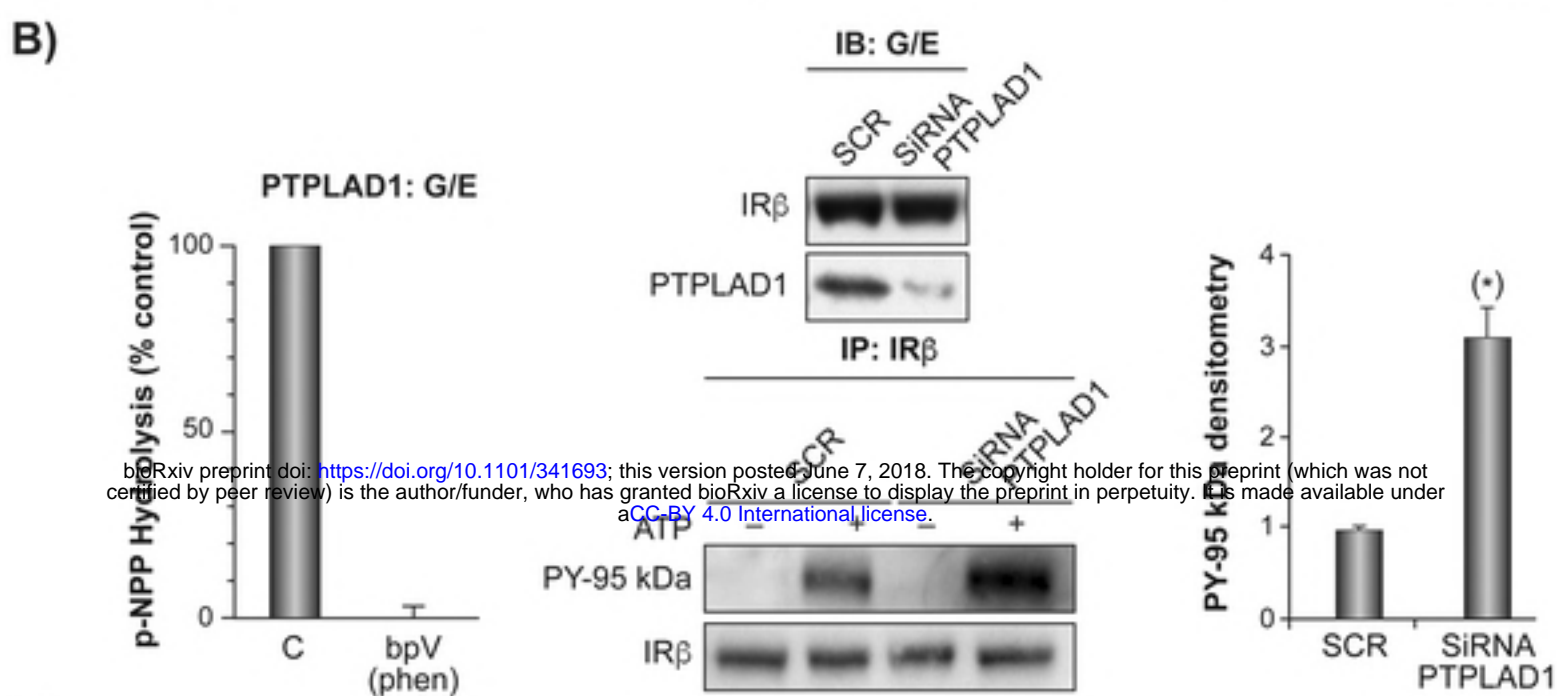

bioRxiv preprint doi: <https://doi.org/10.1101/341693>; this version posted June 7, 2018. The copyright holder for this preprint (which was not certified by peer review) is the author/funder, who has granted bioRxiv a license to display the preprint in perpetuity. It is made available under aCC-BY 4.0 International license.

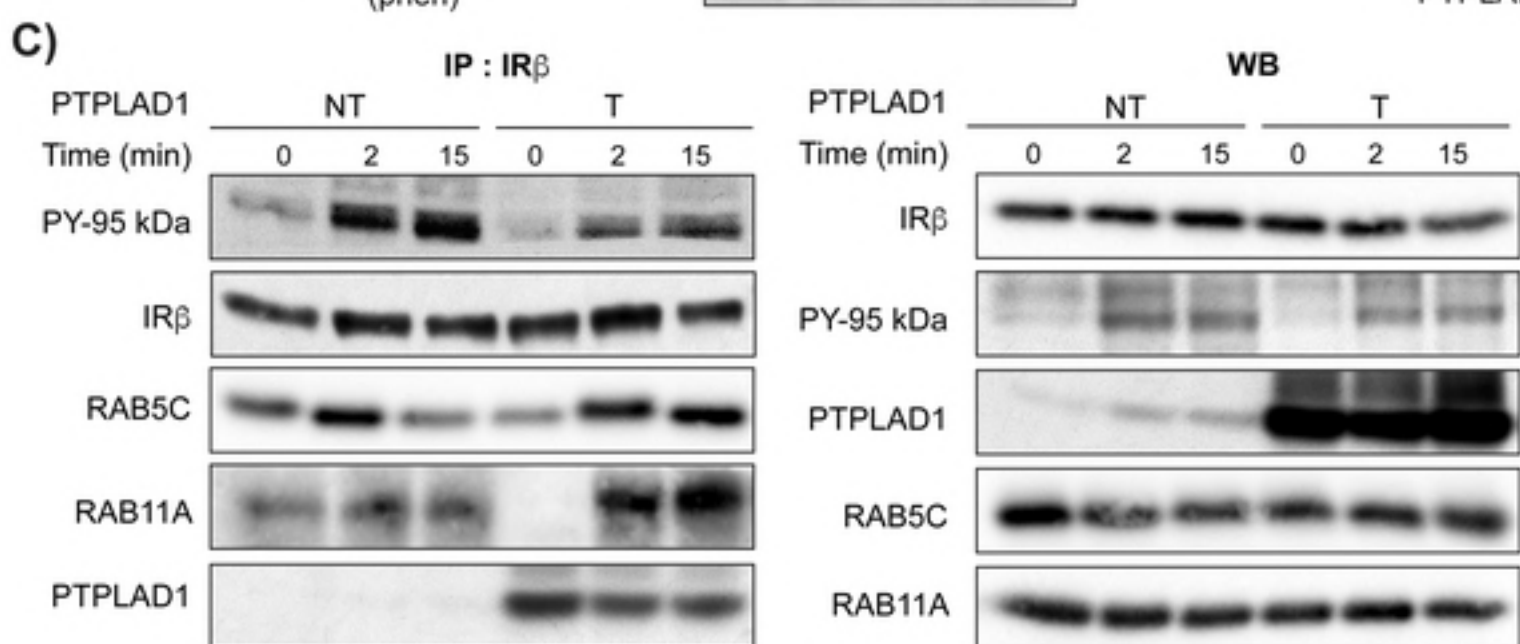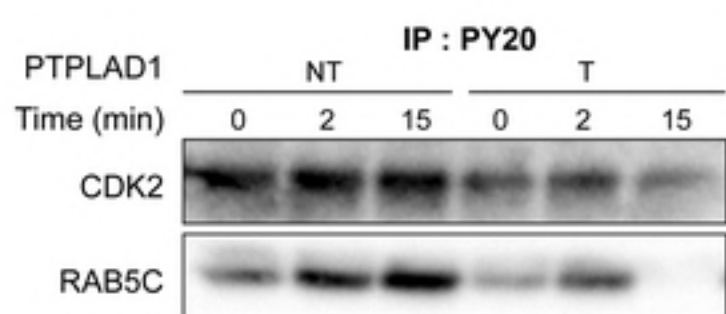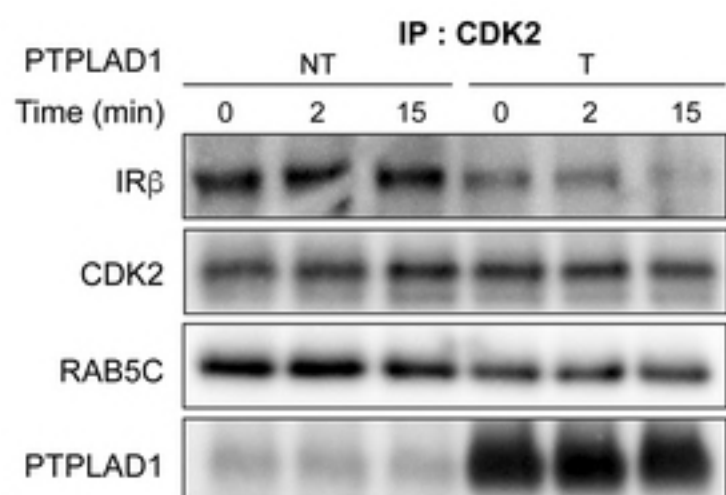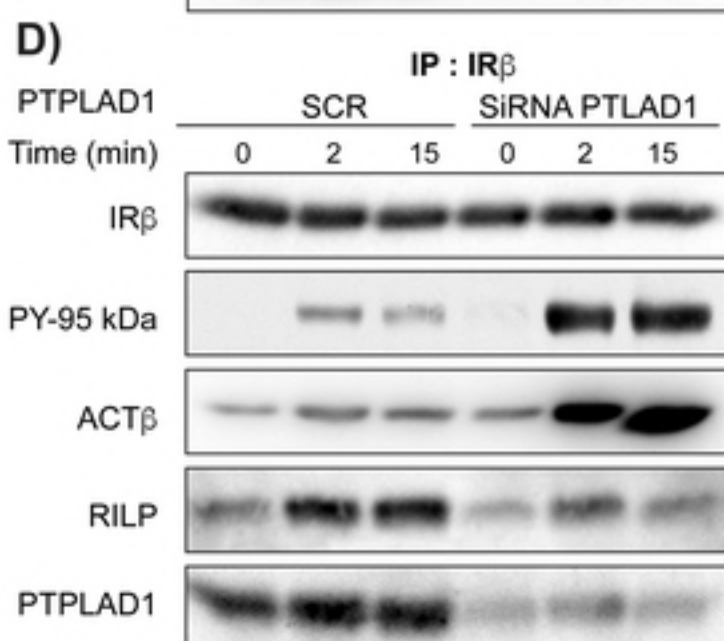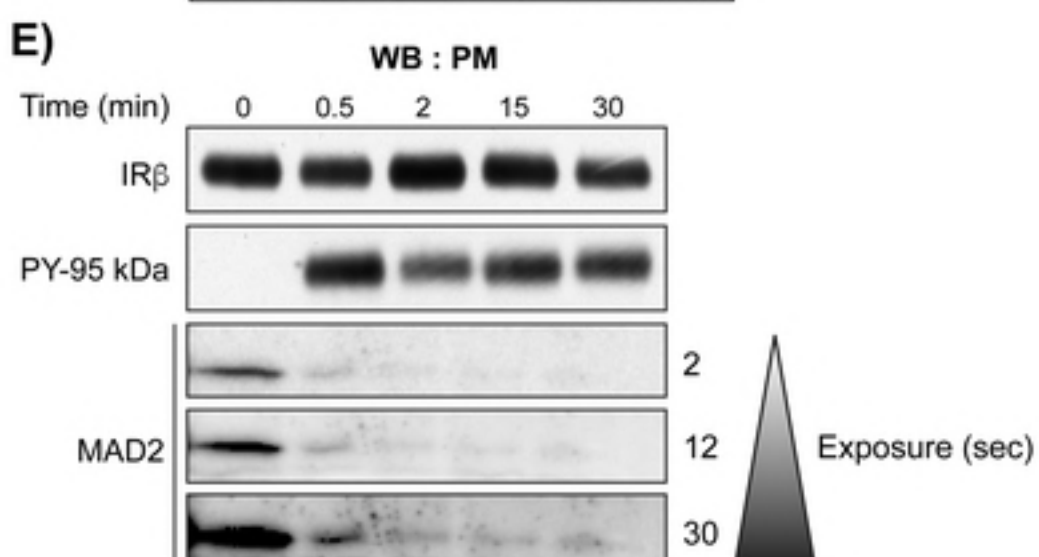

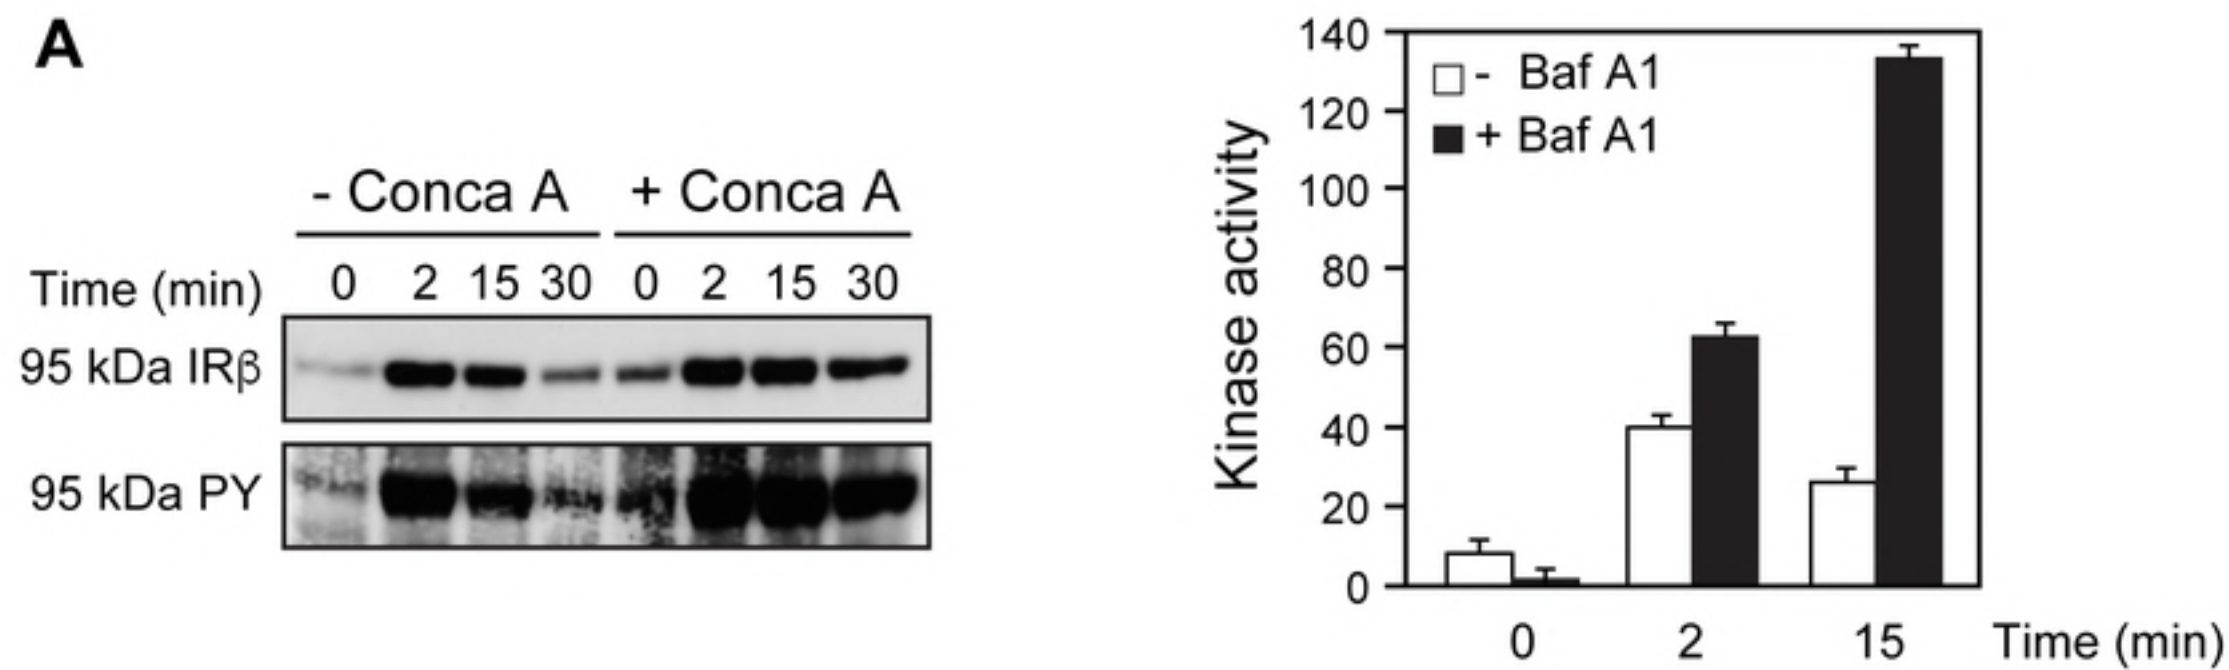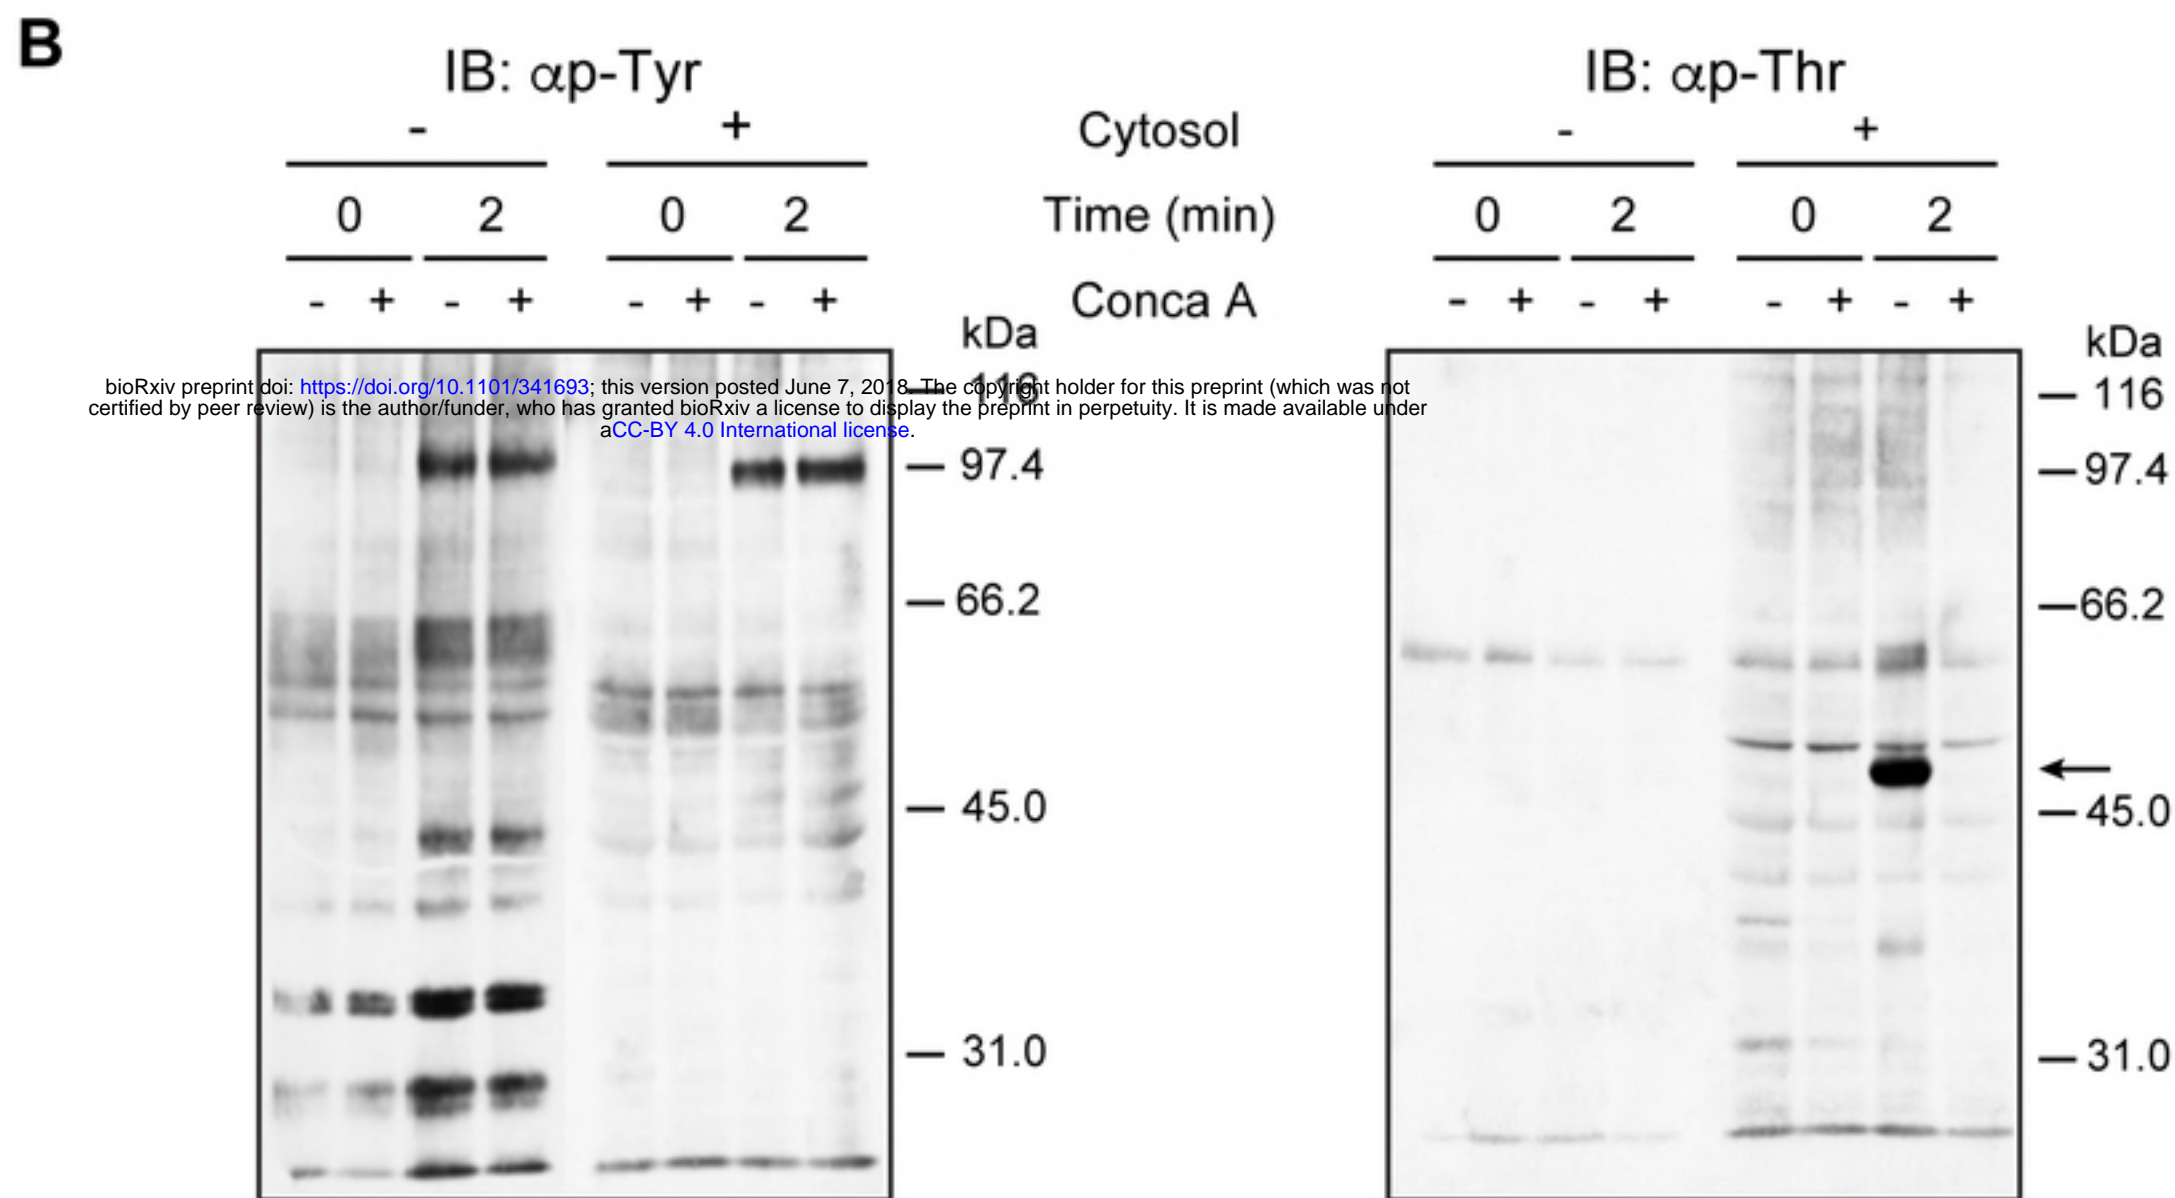

bioRxiv preprint doi: <https://doi.org/10.1101/341693>; this version posted June 7, 2018. The copyright holder for this preprint (which was not certified by peer review) is the author/funder, who has granted bioRxiv a license to display the preprint in perpetuity. It is made available under aCC-BY 4.0 International license.

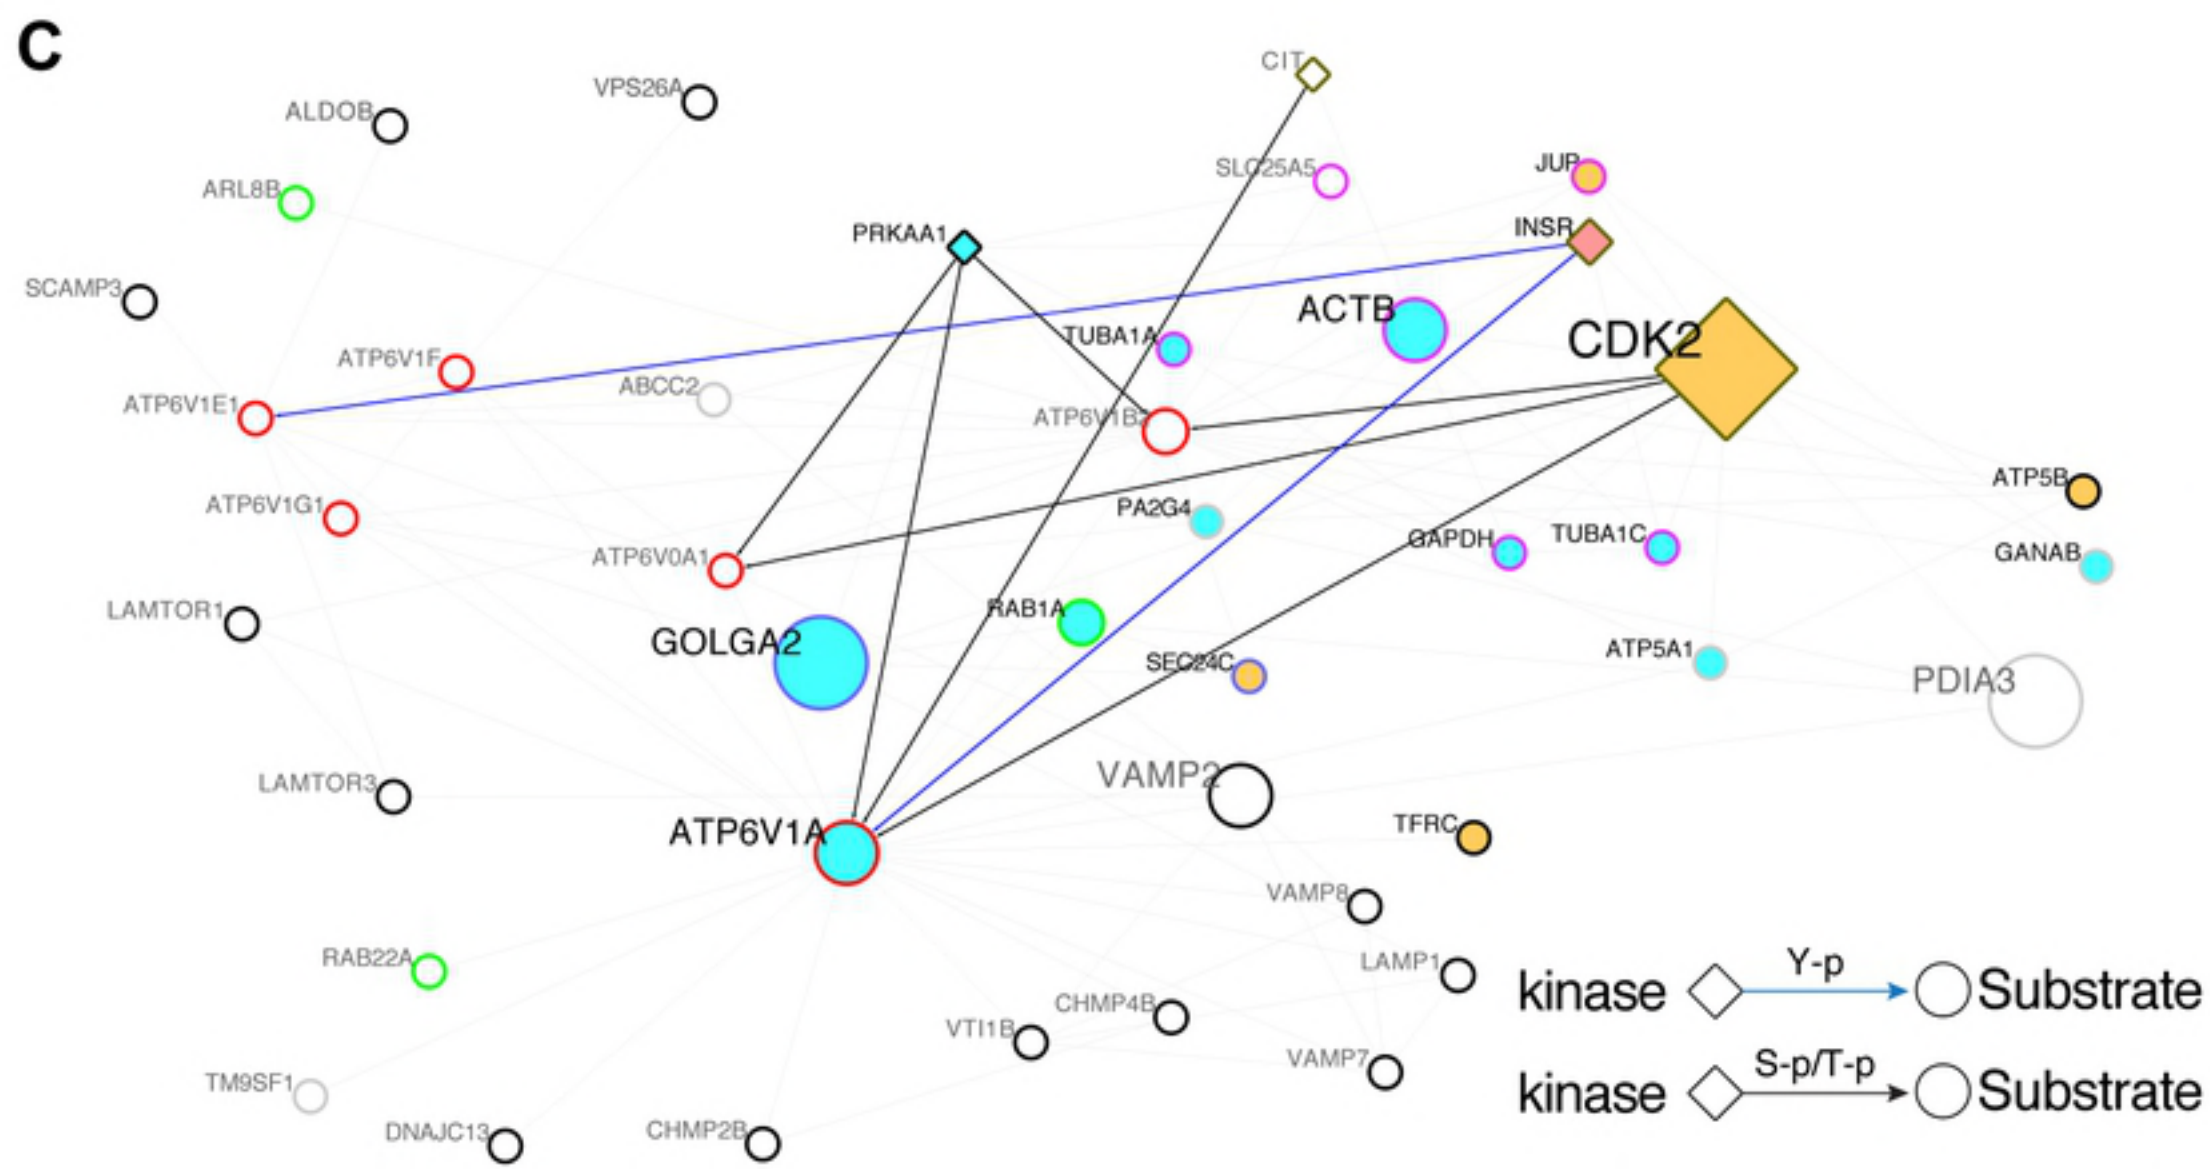

Source: https://www.biorxiv.org/content/10.1101/341693v1.full.pdf
